# Supplementary material
Source: publisher figshare collection journal article supplement (https://gsajournals.figshare.com/articles/dataset/_/15106053)
Supplement: Supplementary file 1 [file 1]

## Sheet: Phenotype
Line	PlantHeight(cm)	TillerNumber	HeadingDate(days)	LengthWidthRatio	GrainLength(mm)	GrainWidth(mm)	SinglePlantYield(g)
1	83	11	135	2.593	8.251	3.187	30.03
2	77	48	140	3.078	8.659	2.82	23.13
3	67	18	105	2.635	8.542	3.247	9.42
4	87	46	118	2.575	8.209	3.194	35
5	84	16	118	NA	NA	NA	NA
6	78	16	122	2.639	8.391	3.186	6.89
7	76	11	126	2.865	8.261	2.89	9.91
8	84	18	132	3.051	9.12	2.995	25.64
9	82	16	141	3.061	9.032	2.958	36.71
10	90	22	141	2.99	8.959	3.002	59.73
11	96	11	114	2.82	8.656	3.072	11.17
12	85	11	148	2.722	7.929	2.916	32.99
13	91	11	148	3.089	9.639	3.122	28.13
14	73	12	127	2.753	8.421	3.067	19.49
15	76	21	123	2.626	8.153	3.111	45.42
16	85	5	150	2.792	8.351	2.998	13.52
17	69	4	130	2.902	9.08	3.139	3.84
18	81	19	143	2.784	8.337	2.998	49.06
19	83	15	129	2.673	7.934	2.971	29.71
20	84	11	140	3.118	9.471	3.04	19.44
21	76	17	130	NA	NA	NA	NA
22	74	21	114	NA	NA	NA	NA
23	84	14	140	2.854	8.491	2.978	34.33
24	77	19	144	3.272	9.2	2.815	25.79
25	78	16	124	2.618	7.851	3.001	28.52
26	83	18	142	2.717	8.354	3.08	49.06
27	80	22	124	2.524	7.934	3.147	38.92
28	74	23	130	2.753	8.17	2.971	47.25
29	77	9	147	NA	NA	NA	NA
30	78	12	134	2.469	7.944	3.22	2.53
31	73	23	126	2.76	8.408	3.051	36.48
32	82	21	124	2.775	8.176	2.953	12.32
33	77	25	116	2.635	8.174	3.106	3.06
34	89	23	142	3.098	9.535	3.084	53.91
35	84	31	124	2.843	8.354	2.946	29.35
36	83	16	143	2.452	7.776	3.174	34.89
37	77	15	141	2.874	8.357	2.913	31.58
38	77	13	128	3.337	9.761	2.932	19.95
39	84	16	143	NA	NA	NA	NA
40	90	10	149	2.583	8.154	3.159	18.35
41	88	19	126	2.827	8.591	3.043	12.91
42	78	21	120	2.583	8.223	3.186	24.08
43	85	19	128	2.866	8.459	2.957	53.16
44	74	22	124	NA	NA	NA	NA
45	76	13	126	3.459	9.767	2.833	10.72
46	75	14	114	3.283	9.27	2.834	15.04
47	92	14	148	3.175	9.451	2.984	43.93
48	79	14	144	2.801	8.411	3.007	25.62
49	92	13	149	2.702	8.494	3.146	38.92
50	68	11	131	2.517	8.01	3.189	14.76
51	79	24	141	2.684	8.249	3.079	89.93
52	69	28	122	NA	NA	NA	NA
53	69	22	114	2.852	8.804	3.093	13.83
54	76	11	126	2.672	8.349	3.129	19.47
55	75	18	139	3.033	9.224	3.046	32.27
56	77	12	143	3.315	9.466	2.862	27.4
57	71	22	140	3.365	9.284	2.767	37.06
58	71	14	119	2.894	8.936	3.091	30.64
59	86	13	147	2.763	8.244	2.988	40.71
60	67	16	140	2.665	8	3.007	22.82
61	87	16	NA	2.718	8.487	3.126	56.99
62	66	20	126	3.001	8.791	2.932	24.8
63	72	11	135	2.731	8.559	3.138	32.38
64	88	30	123	2.919	9.164	3.143	31.42
65	83	16	149	2.96	8.862	2.997	NA
66	81	12	124	2.577	8.197	3.186	23.59
67	79	9	136	2.719	8.428	3.104	20.41
68	78	12	141	2.457	8.113	3.306	30.6
69	82	16	119	2.742	8.349	3.049	27.19
70	72	22	111	2.546	8.062	3.169	NA
71	80	16	140	2.642	8.162	3.091	NA
72	61	18	114	3.355	9.003	2.69	9.9
73	86	29	131	2.778	8.561	3.085	85.56
74	74	21	124	3.238	9.368	2.898	6.06
75	76	17	130	3.093	9.169	2.968	31.88
76	74	15	128	NA	NA	NA	35.01
77	84	9	144	2.873	8.216	2.863	24.73
78	87	17	139	2.877	8.596	2.991	46.55
79	80	26	141	3.316	9.329	2.815	52.07
80	74	16	115	NA	NA	NA	NA
81	73	17	126	3.248	9.22	2.842	34.12
82	76	16	127	2.923	8.426	2.886	18.72
83	74	17	114	2.871	8.521	2.972	15.29
84	72	15	109	3.037	8.783	2.896	5.84
85	104	11	154	2.441	8.133	3.334	40.38
86	75	22	114	2.622	8.147	3.109	26.5
87	57	11	123	2.633	7.937	3.018	16.92
88	88	14	142	NA	NA	NA	36.38
89	79	23	118	NA	NA	NA	NA
90	89	17	125	2.732	8.53	3.133	28
91	97	16	NA	2.884	9.329	3.237	60.65
92	73	14	141	2.691	8.45	3.143	37.2
93	84	12	127	2.701	8.593	3.183	30.81
94	87	10	140	2.545	8.209	3.229	40.62
95	86	15	142	2.734	8.546	3.129	49.76
96	87	13	148	2.535	7.933	3.131	40.43
97	71	19	129	3.198	9.177	2.875	22.89
98	75	13	124	NA	NA	NA	NA
99	80	13	141	NA	NA	NA	18.46
100	89	13	145	2.528	7.892	3.125	43.94
101	81	21	117	2.552	8.209	3.22	19.09
102	67	16	141	2.87	8.297	2.895	47.2
103	67	14	120	2.687	8.09	3.014	19.9
104	73	18	115	2.653	8.301	3.131	19.24
105	66	12	119	2.982	9.205	3.091	21.54
106	80	21	121	2.582	8.481	3.289	32.45
107	69	20	129	2.891	8.778	3.04	35.69
108	82	14	145	2.792	8.461	3.035	35.39
109	79	29	117	2.557	7.956	3.115	40.26
110	74	21	105	2.624	8.241	3.144	19.87
111	77	27	114	2.712	8.008	2.954	38.03
112	82	18	142	2.641	8.077	3.061	42.01
113	83	15	142	2.708	8.227	3.042	33.56
114	66	20	111	2.791	8.625	3.094	15.96
115	70	20	112	3.312	9.305	2.814	20.97
116	76	15	142	2.527	8.139	3.225	49.24
117	65	21	117	2.886	8.679	3.011	37.31
118	77	16	142	2.763	8.243	2.987	32.3
119	75	15	142	2.857	8.32	2.915	32.74
120	53	13	119	2.901	8.454	2.917	19.68
121	70	16	135	3.271	9.327	2.854	37.64
122	73	14	136	2.971	9	3.032	34.12
123	96	25	119	2.591	8.157	3.157	44.15
124	83	18	149	2.861	8.526	2.984	55.96
125	68	21	118	2.979	9.177	3.084	20.07
126	88	11	148	2.48	8.081	3.261	28.71
127	65	12	116	2.648	8.498	3.212	20.85
128	72	15	142	2.536	8.161	3.221	26.11
129	92	14	135	2.583	7.963	3.086	38.47
130	78	9	134	2.68	8.243	3.079	25.64
131	74	14	150	2.888	8.342	2.891	12.26
132	83	16	127	2.748	8.214	2.998	18.33
133	70	19	119	2.547	8.157	3.206	26.88
134	NA	NA	122	NA	NA	NA	NA
135	84	21	143	2.52	8.212	3.261	7.17
136	66	26	116	3.207	9.212	2.875	23.29
137	81	12	122	2.515	7.861	3.127	25.78
138	74	17	124	2.919	8.314	2.851	35.46
139	86	18	140	2.638	8.328	3.159	48.97
140	85	15	140	NA	NA	NA	NA
141	82	13	141	3.001	8.987	2.997	23.43
142	81	11	137	2.728	8.44	3.098	22.88
143	91	7	154	3.388	9.842	2.907	14.76
144	71	25	108	2.947	8.148	2.768	10.55
145	71	13	139	2.622	8.303	3.17	31.44
146	119	28	118	2.936	8.412	2.868	22.56
147	70	8	142	2.505	8.031	3.208	20.39
148	69	11	135	2.537	7.963	3.142	17.21
149	75	18	128	NA	NA	NA	NA
150	83	8	149	2.989	8.752	2.93	18.45
151	73	20	134	2.652	8.064	3.044	28
152	81	13	145	2.94	8.977	3.055	33.76
153	70	9	132	2.672	8.727	3.268	24.95
154	76	11	141	2.696	8.774	3.257	17.1
155	83	16	124	2.84	8.657	3.054	17.71
156	79	9	152	3.243	9.797	3.023	25.83
157	74	20	128	2.62	8.174	3.123	46.85
158	67	9	133	2.902	8.407	2.9	14.5
159	77	13	149	3.003	8.793	2.932	36.4
160	70	28	108	2.832	8.174	2.89	20.13
161	73	20	136	2.429	7.669	3.16	33.35
162	83	17	153	2.849	8.617	3.028	52.86
163	90	8	151	2.681	8.459	3.157	20.83
164	65	21	108	2.821	8.212	2.913	12.15
165	74	10	145	2.503	8.106	3.241	19.97
166	73	20	118	2.817	8.585	3.051	17.79
167	99	13	149	2.887	9.45	3.279	49.52
168	51	9	133	2.94	8.993	3.066	3.63
169	75	14	129	2.937	9.008	3.069	18.61
170	66	15	111	2.839	8.276	2.918	10.29
171	80	31	129	2.689	8.637	3.216	39.7
172	75	14	141	2.537	8.054	3.177	31.65
173	113	16	NA	2.762	8.603	3.119	18.82
174	67	13	106	3.108	8.843	2.847	12.06
175	84	11	121	2.617	8.45	3.235	22.6
176	82	12	152	2.827	9.042	3.201	31.47
177	68	21	116	3.205	9.555	2.983	26.25
178	82	15	139	2.555	8.224	3.221	26.91
179	76	13	142	2.823	8.159	2.893	33.45
180	73	17	143	3.173	9.545	3.011	46.33
181	79	7	132	2.645	8.145	3.082	7.07
182	65	6	135	2.757	8.313	3.017	3.66
183	60	10	134	2.763	8.431	3.054	19.23
184	83	19	142	2.74	8.162	2.981	51.08
185	98	21	155	2.833	8.551	3.02	60.67
186	76	15	134	2.95	8.52	2.893	17.62
187	72	8	136	2.993	8.728	2.918	16.99
188	73	13	114	2.778	8.463	3.05	14.75
189	78	15	128	2.809	9.072	3.234	32.93
190	101	25	145	2.779	8.32	2.996	56.73
191	74	19	110	2.653	8.17	3.082	18.25
192	67	14	134	2.498	8.351	3.345	18.94
193	77	14	141	2.891	8.876	3.073	35.08
194	95	13	153	2.512	8.557	3.409	23.14
195	82	15	142	2.47	7.839	3.175	20.99
196	76	20	122	2.608	8.448	3.242	45.82
197	88	16	150	2.671	8.22	3.08	35.8
198	63	8	113	2.757	8.702	3.159	7.83
199	80	23	122	2.946	8.459	2.873	18.16
200	72	13	125	2.644	8.26	3.127	13.47
201	76	13	127	2.839	9.253	3.262	40.63
202	81	17	142	NA	NA	NA	20.82
203	71	24	114	2.592	8.263	3.19	NA
204	86	21	125	2.79	8.504	3.052	23.85
205	79	14	123	2.666	8.348	3.134	19.93
206	79	18	136	2.818	8.367	2.975	42.41
207	74	19	122	3.053	9.343	3.062	16.55
208	78	33	105	2.982	8.844	2.97	30.9
209	60	9	NA	2.779	8.279	2.982	1.59
210	67	12	131	2.588	8.246	3.188	14.88
211	86	10	144	2.999	9.346	3.12	32.89
212	67	16	NA	2.638	8.593	3.259	13.31
213	84	18	146	2.463	7.985	3.244	69.06
214	78	18	119	2.886	8.444	2.929	20.39
215	75	16	134	2.959	8.616	2.915	7.96
216	75	21	142	2.774	8.41	3.035	40.28
217	93	22	142	2.657	8.257	3.11	87.22
218	81	16	137	2.775	8.348	3.011	36.2
219	77	10	145	2.591	8.502	3.284	22.75
220	60	18	120	2.809	8.479	3.02	12.69
221	70	26	122	3.481	9.62	2.767	33.02
222	82	18	146	2.712	8.367	3.088	47.47
223	79	13	134	2.717	8.514	3.137	25.1
224	75	12	143	NA	NA	NA	NA
225	73	11	143	2.905	8.508	2.931	12.71
226	76	50	123	2.762	8.209	2.976	43.15
227	76	12	122	3.012	9.092	3.02	16.18
228	91	11	144	3.063	9.264	3.028	27.75
229	84	15	142	2.865	8.596	3.004	24.3
230	78	32	116	2.779	8.022	2.889	13.89
231	85	18	141	2.399	7.827	3.266	51.48
232	80	14	121	2.707	8.415	3.112	18.04
233	100	10	152	2.73	8.328	3.053	29.97
234	77	12	122	2.578	7.759	3.013	24.95
235	86	12	141	2.887	8.814	3.055	27.63
236	76	23	127	2.779	8.492	3.058	49.22
237	85	14	148	2.463	7.971	3.238	44.29
238	73	17	132	2.577	7.95	3.088	23.49
239	74	16	142	3.129	9.148	2.927	37.8
240	72	9	140	2.746	8.717	3.177	20.09
241	77	10	114	2.897	8.793	3.039	2.75
242	73	5	142	2.812	8.715	3.098	7.47
243	90	21	143	2.707	7.989	2.954	65.52
244	70	10	116	NA	NA	NA	NA
245	90	21	136	2.716	8.166	3.009	56.14
246	70	14	141	2.764	8.795	3.184	26.61
247	81	27	113	2.545	8.066	3.171	29
248	75	17	140	2.936	8.491	2.894	22.97
249	77	12	127	2.706	8.429	3.118	24.11
250	79	14	120	2.727	8.055	2.956	24.6
251	75	9	145	3.089	9.027	2.925	20.35
252	73	13	110	3.294	9.565	2.907	8.84
253	69	25	121	NA	NA	NA	NA
254	82	13	141	2.902	8.896	3.068	22.88
255	85	13	132	2.893	9.249	3.2	26.62
256	72	22	105	3.034	8.647	2.854	10.96
257	76	14	114	2.514	8.206	3.267	20.47
258	78	13	131	3.244	9.381	2.895	15.79
259	67	10	111	3.07	8.852	2.886	13.31
260	84	12	108	2.861	9.016	3.154	29.44
261	61	12	141	NA	NA	NA	NA
262	81	22	108	3.412	9.726	2.853	45.27
263	70	8	119	2.658	8.303	3.127	7.39
264	82	11	142	2.475	7.69	3.109	35.88
265	75	12	136	3.209	9.476	2.957	25.16
266	83	25	125	3.014	9.362	3.108	27.57
267	72	14	120	2.687	8.538	3.18	21.21
268	84	22	144	3.134	9.707	3.1	61.44
269	86	22	149	2.924	8.791	3.009	43.04
270	78	14	133	2.705	8.056	2.98	16.41
271	75	15	143	NA	NA	NA	NA
272	75	9	108	2.746	8.34	3.04	8.23
273	83	10	142	2.665	8.018	3.011	29.33
274	75	15	141	2.746	8.198	2.988	34.97
275	69	8	124	2.826	8.714	3.086	11.2
276	70	15	129	2.761	8.6	3.118	17.32
277	86	15	145	3.403	9.718	2.859	41.19
278	86	17	145	2.611	8.219	3.151	66.23
279	82	12	141	2.959	8.164	2.762	16.28
280	80	18	126	NA	NA	NA	NA
281	87	12	143	2.636	8.184	3.108	29.67
282	76	26	105	2.974	8.217	2.765	13.84
283	71	9	130	2.833	9.007	3.182	14.29
284	74	18	109	2.677	8.251	3.085	10.5
285	90	24	120	2.853	8.598	3.016	60.97
286	74	9	136	3.232	9.272	2.873	12.93
287	73	10	132	2.529	8.036	3.18	17.38
288	86	13	144	2.739	8.196	2.994	33.99
289	88	14	129	3.13	9.229	2.95	22.8
290	83	36	145	2.429	7.909	3.259	104.96
291	71	18	136	2.665	8.025	3.014	31.35
292	70	19	111	2.479	7.918	3.197	26.28
293	80	11	141	2.859	8.184	2.865	12.7
294	92	22	143	2.921	8.804	3.016	77.72
295	69	12	133	3.15	9.102	2.891	16.42
296	70	7	141	3.048	9.103	2.99	4.62
297	77	11	143	2.632	8.254	3.138	36.93
298	67	21	112	3.117	9.044	2.905	11.91
299	74	21	122	2.79	8.335	2.991	16.67
300	78	19	142	2.674	8.544	3.197	50.83
301	75	14	137	2.916	8.387	2.879	23.94
302	70	13	141	3.109	9.525	3.068	25.11
303	78	8	142	3.236	9.933	3.072	10.77
304	81	19	147	2.879	9.12	3.171	46.62
305	92	14	126	2.679	8.342	3.118	6.68
306	81	22	115	2.871	8.593	2.996	33.81
307	71	12	144	NA	NA	NA	NA
308	82	12	121	2.752	8.546	3.107	16.53
309	86	15	137	2.703	8.293	3.07	19.56
310	76	10	138	2.618	8.21	3.138	14.16
311	71	19	127	2.694	8.306	3.086	32.02
312	83	18	120	3.114	9.306	2.991	30.59
313	81	16	142	3.397	9.662	2.847	39.34
314	72	12	120	2.84	8.213	2.896	11.21
315	89	14	143	2.711	8.479	3.13	39.5
316	80	12	142	2.739	8.379	3.062	25.77
317	79	22	144	NA	NA	NA	NA
318	65	14	142	2.702	8.236	3.053	31.49
319	89	13	155	2.617	8.537	3.265	27.26
320	65	13	108	NA	NA	NA	7.29
321	90	9	150	2.697	8.454	3.137	23.29
322	72	9	140	2.417	8.291	3.434	18.4
323	68	27	118	2.8	8.573	3.066	17.65
324	87	12	150	2.772	8.848	3.195	34.3
325	83	12	123	2.845	8.472	2.981	14.04
326	71	10	119	2.883	8.645	3.002	3.19
327	71	8	151	2.936	8.333	2.841	6.56
328	85	15	141	2.985	8.454	2.839	20.98
329	62	16	132	2.969	9.252	3.118	28.52
330	75	11	146	2.646	8.244	3.119	28.54
331	70	6	140	2.537	7.929	3.129	0.79
332	88	9	143	2.776	8.685	3.132	11.68
333	75	15	NA	NA	NA	NA	NA
334	76	11	143	2.74	7.849	2.867	8.75
335	72	18	137	2.518	8.126	3.23	10.56
336	69	10	111	2.832	8.383	2.962	3.9
337	66	8	141	2.787	8.307	2.983	3
338	74	NA	143	NA	NA	NA	NA
339	70	20	123	3.1	8.657	2.797	27.49
340	84	11	145	2.443	8.301	3.401	31.2
341	79	18	141	2.837	8.468	2.988	41.98
342	77	15	142	2.705	8.525	3.155	29.89
343	77	10	143	3.108	9.377	3.02	24.04
344	92	31	142	2.971	8.394	2.827	56.2
345	74	15	131	3.118	9.17	2.945	10.24
346	60	5	125	2.979	9.44	3.169	0.55
347	63	6	114	2.947	9.27	3.147	8.3
348	NA	NA	113	NA	NA	NA	NA
349	76	13	150	2.778	8.947	3.223	31.69
350	80	11	143	2.709	8.027	2.965	27.84
351	65	9	138	3.22	9.661	3.003	13.22
352	79	11	147	2.757	9.058	3.288	18.47
353	77	14	133	2.489	8.06	3.241	36.89
354	82	8	148	2.643	8.748	3.312	21.69
355	72	NA	111	NA	NA	NA	NA
356	80	NA	144	3.044	8.909	2.93	24.77
357	66	NA	143	2.735	8.582	3.14	10.85
358	75	16	143	3.475	9.232	2.661	17.8
359	99	27	148	2.679	8.292	3.098	40.63
360	77	9	141	2.795	8.108	2.903	7.41
361	70	12	128	2.603	8.144	3.132	16.88
362	70	NA	139	2.727	8.193	3.006	10.35
363	74	10	144	2.641	8.378	3.174	20.07
364	80	NA	133	3.012	8.673	2.882	52.05
365	70	18	118	3.196	9.13	2.861	20.38
366	78	13	144	2.956	9.171	3.106	31.76
367	80	11	148	2.685	8.119	3.026	31.27
368	81	9	141	NA	NA	NA	NA
369	80	NA	128	2.83	8.655	3.061	11.74
370	79	NA	131	2.582	8.031	3.112	37.17
371	76	14	114	3.04	8.895	2.93	12.01
372	77	12	127	2.673	8.161	3.055	9.85
373	75	8	141	2.826	8.632	3.058	17.97
374	72	6	141	2.719	8.648	3.184	21.86
375	75	10	121	3.235	9.492	2.936	8.95
376	84	21	142	2.726	8.276	3.038	79.43
377	86	17	145	2.901	8.662	2.988	40.82
378	86	12	145	2.367	7.688	3.251	19.79
379	78	10	151	2.938	9.121	3.107	22.75
380	61	8	135	2.835	8.49	2.997	4.31
381	74	16	142	2.655	8.01	3.02	28.22
382	67	11	128	2.547	8.111	3.187	16.44
383	63	13	126	3.021	8.697	2.88	NA
384	70	9	144	2.622	8.638	3.297	7.84
385	71	10	145	2.688	8.084	3.009	11.48
386	79	15	114	NA	NA	NA	18.83
387	79	20	143	3.184	9.241	2.904	27.25
388	60	12	142	3.267	9.282	2.843	13.55
389	79	13	125	3.128	9.466	3.029	21.84
390	77	9	142	2.828	8.619	3.051	17.18
391	60	10	119	3.301	9.733	2.951	8.11
392	80	18	137	2.7	8.309	3.081	34.17
393	86	10	137	2.879	8.562	2.978	21.87
394	81	16	121	2.468	7.859	3.187	20.31
395	86	10	150	3.069	9.581	3.125	23.47
396	71	18	142	3.07	9.394	3.063	26.75
397	68	14	123	2.947	8.919	3.028	15.68
398	81	9	143	2.643	8.35	3.163	22.38
399	86	13	143	2.55	8.188	3.213	23.26
400	69	20	142	2.636	8.325	3.16	23.78
401	72	13	136	2.9	8.557	2.954	11.45
402	78	8	149	2.578	8.205	3.186	24.8
403	82	12	140	2.836	8.215	2.899	16.19
404	80	15	141	3.019	8.776	2.909	22.54
405	73	31	123	3.106	9.301	2.997	40.35
406	75	15	142	2.99	8.999	3.014	9.76
407	82	8	124	2.585	8.035	3.111	4.02
408	59	13	143	2.663	8.101	3.044	15.81
409	73	17	117	2.831	8.599	3.041	22.83
410	85	23	143	2.712	8.487	3.132	10.21
411	82	11	157	3.083	9.63	3.126	13.49
412	75	11	145	2.775	8.279	2.986	17.91
413	76	13	141	2.609	8.447	3.24	17.06
414	78	10	123	2.646	8.087	3.059	20.09
415	56	17	134	2.652	8.082	3.05	30.37
416	73	14	118	NA	NA	NA	NA
417	69	10	113	2.877	8.639	3.006	8.7
418	62	13	NA	3.333	9.625	2.89	6.72
419	85	14	152	2.862	8.847	3.093	47.2
420	77	19	122	3.203	10.025	3.132	42.01
421	68	12	123	3.165	9.411	2.976	15.74
422	80	13	148	2.75	8.233	2.996	37.37
423	83	16	143	2.804	8.31	2.966	50.75
424	76	16	127	2.997	8.539	2.852	29.37
425	80	12	141	2.712	8.362	3.086	19.75
426	78	14	143	2.687	8.265	3.078	25.22
427	87	11	142	2.621	8.588	3.278	18.91
428	79	14	122	2.557	8.609	3.369	22.15
429	74	13	141	2.552	7.882	3.091	NA
430	79	14	NA	2.924	8.703	2.979	48.68
431	81	21	142	2.698	8.087	3	21.35
432	75	15	143	2.807	8.339	2.972	41.02
433	90	12	151	2.649	8.382	3.166	35.19
434	60	12	143	2.907	8.751	3.013	15.36
435	67	3	143	NA	NA	NA	NA
436	100	10	146	2.543	8.16	3.21	25.96
437	66	5	105	3.075	8.243	2.683	1.3
438	61	12	113	3.205	8.687	2.713	7.73
439	78	11	149	2.713	8.296	3.06	38.75
440	79	11	149	2.971	9.345	3.148	28.74
441	57	17	128	2.938	8.241	2.811	7.77
442	65	9	124	3.131	9.39	3.001	11.32
443	80	21	142	2.549	7.982	3.135	63.08
444	83	10	142	2.534	8.115	3.205	31.79
445	63	17	143	3.189	9.468	2.973	20.9
446	92	9	152	2.475	8.096	3.273	30.18
447	76	11	145	2.557	8.095	3.168	27.3
448	66	11	142	2.713	9.162	3.38	16.72
449	87	16	142	2.402	7.881	3.284	33.91
450	87	17	155	2.481	8.171	3.295	62.74
451	60	11	112	2.933	8.953	3.055	3.28
452	72	12	119	2.748	8.163	2.973	20.59
453	69	10	142	2.741	8.548	3.121	13.53
454	70	5	112	2.827	8.252	2.922	0.26
455	77	17	142	NA	NA	NA	NA
456	72	19	110	2.82	8.312	2.95	9.41
457	70	13	140	2.453	8.014	3.271	24.86
458	63	10	112	3.109	9.116	2.935	3.53
459	69	10	142	3.431	9.66	2.819	10.32
460	72	14	142	NA	NA	NA	NA
461	91	19	147	3.213	9.486	2.956	42.73
462	83	15	143	3.169	9.3	2.938	18.14
463	63	14	130	3.133	9.366	2.993	9.35
464	67	13	107	3.118	9.235	2.964	9.34
465	72	16	118	3.053	8.885	2.913	13.76
466	65	8	110	2.506	8.06	3.219	2.44
467	76	8	147	3.105	9.289	2.993	20.47
468	73	16	113	3.005	8.617	2.869	19.51
469	72	15	144	2.868	8.666	3.023	16.04
470	81	11	143	2.903	8.6	2.965	33.83
471	75	9	134	2.698	9.009	3.341	23.69
472	66	7	146	2.889	8.832	3.06	9.29
473	63	10	115	3.003	8.653	2.884	5.19
474	75	10	140	3.035	8.831	2.912	14.69
475	75	15	NA	2.887	8.348	2.893	22.62
476	72	10	130	2.732	8.614	3.155	13.72
477	80	10	142	2.848	8.731	3.069	15.44
478	77	7	109	2.885	8.185	2.84	3.53
479	84	6	153	NA	NA	NA	NA
480	77	10	131	2.888	8.796	3.048	14.38
481	73	16	132	2.552	7.913	3.103	18.03
482	88	12	148	2.638	8.572	3.252	41.18
483	74	10	142	2.661	8.445	3.175	24.87
484	84	13	150	2.853	8.438	2.961	24.65
485	75	12	131	2.814	8.56	3.045	22.76
486	76	11	143	2.954	8.355	2.831	6.43
487	62	14	123	3.037	9.516	3.136	32.53
488	87	NA	151	NA	NA	NA	NA
489	69	13	141	2.624	8.705	3.32	8.83
490	66	17	123	2.885	8.738	3.03	8.08
491	83	11	141	2.617	7.6	2.907	12.92
492	63	7	136	2.512	8.634	3.439	12.46
493	60	15	121	3.059	9.144	2.991	2.23
494	80	22	113	2.64	8.39	3.181	53.57
495	75	15	143	NA	NA	NA	NA
496	51	15	118	3.136	8.786	2.805	4.64
497	60	8	136	2.739	8.297	3.031	4.85
498	74	12	150	2.637	8.345	3.167	32.8
499	86	10	143	2.59	7.749	2.994	20.92
500	69	14	134	2.774	8.553	3.086	21.99
501	87	17	149	2.786	8.13	2.92	50.59
502	76	16	151	2.745	8.662	3.158	42.9
503	78	20	129	3.122	9.181	2.943	16.64
504	80	13	134	2.564	8.256	3.222	13.3
505	68	12	133	3.056	9.148	2.997	15.89
506	84	7	152	2.676	8.126	3.039	17.61
507	67	16	120	2.798	8.546	3.056	24.79
508	63	9	129	3.052	8.668	2.842	7.25
509	73	9	140	2.776	8.328	3.002	18.06
510	75	11	127	2.689	8.287	3.084	3.06
511	79	NA	145	3.074	9.144	2.978	18.18
512	86	9	142	2.792	8.4	3.013	20.96
513	79	15	142	2.668	8.186	3.07	30.69
514	68	19	127	3.177	8.883	2.798	11.89
515	75	21	114	2.738	8.602	3.144	17.92
516	65	8	141	2.959	8.366	2.83	4.43
517	73	11	142	2.767	8.613	3.115	32.79
518	63	8	151	2.868	8.692	3.033	16.89
519	82	6	151	2.67	8.651	3.242	15.52
520	71	14	141	3.004	8.723	2.907	33.9
521	67	19	128	2.854	8.629	3.026	26.57
522	83	13	145	2.689	7.969	2.966	40.59
523	79	13	149	2.649	8.28	3.128	34.91
524	85	12	140	2.785	8.4	3.018	31.36
525	87	17	135	2.925	9.109	3.116	29.26
526	79	11	142	2.69	8.048	2.993	23.78
527	94	12	153	2.864	8.567	2.994	31.96
528	74	11	154	2.662	8.739	3.286	35.68
529	64	16	109	2.651	8.036	3.034	17.41
530	77	12	132	2.392	8.108	3.393	19.29
531	71	13	141	3.195	9.415	2.949	25.97
532	65	13	107	2.711	7.99	2.949	4.36
533	65	37	108	2.513	7.486	2.98	26.25
534	74	15	142	NA	NA	NA	NA
535	78	12	138	2.544	8.346	3.283	37.54
536	81	11	143	2.792	8.549	3.063	23.51
537	80	16	144	NA	NA	NA	NA
538	86	21	139	NA	NA	NA	45.65
539	70	15	144	2.968	8.834	2.979	25.1
540	72	14	126	2.691	8.082	3.005	17.01
541	76	17	141	2.973	9.202	3.098	21.48
542	80	14	122	3.077	8.531	2.775	20.43
543	73	38	124	3.293	9.325	2.835	26.83
544	79	NA	141	2.636	7.89	2.995	27.63
545	79	12	141	3.075	8.629	2.808	18.47
546	87	18	142	NA	NA	NA	NA
547	82	22	124	3.006	8.712	2.9	10.24
548	80	24	142	NA	NA	NA	NA
549	89	13	141	NA	NA	NA	NA
550	73	15	149	2.706	8.66	3.203	41.85
551	75	17	141	2.574	7.805	3.035	33.15
552	68	17	140	2.857	8.735	3.059	29.65
553	84	14	147	2.39	7.952	3.329	46.18
554	69	19	117	2.483	7.623	3.072	17.37
555	64	10	141	3.075	9.178	2.987	21.7
556	73	11	130	2.851	8.771	3.078	23.03
557	82	10	143	2.86	8.095	2.832	15.56
558	83	11	142	2.713	8.334	3.074	25.75
559	81	15	135	2.918	8.9	3.052	16.64
560	72	16	130	2.893	8.367	2.894	16.68
561	70	12	124	3.205	9.542	2.98	19.04
562	73	16	133	2.531	7.978	3.154	8.62
563	87	9	151	2.721	8.304	3.054	24.08
564	88	17	150	3.002	9.277	3.093	42.93
565	87	26	129	2.746	8.396	3.061	47.33
566	76	16	133	2.908	9.196	3.165	26.47
567	78	12	146	NA	NA	NA	NA
568	86	12	140	2.671	8.003	2.998	30.66
569	89	17	142	2.632	8.282	3.149	33.27
570	86	11	141	2.376	7.792	3.282	19.68
571	77	31	136	2.777	8.556	3.083	75.3
572	70	17	141	NA	NA	NA	NA
573	83	17	143	NA	NA	NA	NA
574	82	11	144	2.718	8.488	3.125	21.34
575	80	10	143	2.64	8.032	3.045	22.74
576	68	28	134	3.322	9.448	2.848	16.77
577	65	11	130	2.737	8.177	2.99	13.15
578	60	15	119	2.742	8.402	3.074	8.89
579	64	9	134	2.899	8.551	2.953	16.01
580	84	11	144	3.007	9.396	3.128	29.71
581	88	21	142	NA	NA	NA	NA
582	89	14	152	2.728	8.434	3.094	39.7
583	94	16	149	2.55	8.296	3.255	41.46
584	74	11	142	2.393	7.606	3.182	15.36
585	90	13	150	2.681	9.013	3.365	33.74
586	69	14	133	2.812	8.6	3.059	21.55
587	78	19	151	2.995	8.704	2.908	31.73
588	79	12	138	2.862	8.58	3	21.17
589	78	12	142	2.975	9.29	3.125	24.97
590	75	8	131	2.932	8.741	2.983	12.3
591	82	8	143	2.861	8.841	3.092	18.96
592	85	15	134	2.979	8.631	2.9	23.26
593	91	19	143	2.846	8.475	2.98	45.39
594	67	13	107	NA	NA	NA	NA
595	77	19	132	2.71	8.355	3.087	27.47
596	89	33	122	2.598	8.34	3.213	24.93
597	94	16	150	NA	NA	NA	NA
598	68	19	123	2.554	8.475	3.321	26.06
599	69	19	134	2.715	8.241	3.037	37.97
600	74	8	128	2.55	8.315	3.263	15.68
601	74	22	124	2.721	8.183	3.01	23.56
602	84	21	134	2.618	7.906	3.022	41.02
603	67	NA	133	2.834	8.482	2.996	19.26
604	69	NA	114	3.294	9.29	2.823	9.13
605	70	29	118	2.888	8.523	2.954	14.86
606	74	12	142	3.368	9.268	2.754	21.54
607	65	15	NA	3.164	9.127	2.887	3.33
608	96	20	145	2.952	8.846	2.999	52.71
609	68	9	109	2.638	8.084	3.066	10.33
610	66	16	111	2.728	8.429	3.093	1.48
611	70	17	127	2.774	8.535	3.08	35.68
612	98	17	133	2.623	8.012	3.056	100.17
613	NA	12	143	NA	NA	NA	NA
614	76	13	137	2.721	8.112	2.985	22.58
615	73	18	143	2.56	8.06	3.151	38.52
616	70	20	126	2.691	8.314	3.092	34.88
617	67	15	111	2.916	8.528	2.927	2.33
618	74	15	111	2.614	7.884	3.019	3.18
619	79	17	137	2.81	8.351	2.974	23.47
620	77	18	142	2.818	9.053	3.214	31.59
621	73	12	141	2.481	8.201	3.308	16.87
622	93	21	144	NA	NA	NA	NA
623	72	15	131	3.154	9.198	2.92	16.05
624	79	13	135	2.882	8.8	3.056	13.27
625	69	16	133	2.73	8.191	3.005	17.27
626	87	18	150	2.738	8.983	3.284	54.55
627	69	13	142	2.703	8.592	3.181	21.91
628	78	22	132	2.871	8.485	2.958	21.83
629	86	13	144	2.477	8.127	3.282	32.37
630	74	35	123	2.775	8.696	3.136	8.66
631	74	25	129	2.437	7.871	3.232	39.45
632	78	23	120	2.345	7.682	3.28	16.42
633	77	16	143	2.689	8.164	3.038	18.87
634	81	11	140	2.566	8.52	3.322	21.41
635	100	11	143	3.087	9.3	3.015	22.92
636	70	17	135	2.664	8.328	3.133	7.27
637	83	23	123	2.755	8.244	2.994	30.61
638	72	29	120	2.992	8.472	2.836	10.91
639	74	12	141	2.758	8.372	3.038	12.84
640	78	19	129	2.91	8.62	2.967	37.69
641	89	22	144	2.825	8.584	3.041	60.61
642	88	7	154	2.832	8.878	3.138	11.49
643	70	25	122	3.098	9.224	2.98	13.84
644	81	8	144	2.497	8.006	3.208	15.71
645	60	11	132	2.551	7.88	3.091	16.25
646	92	23	150	2.773	8.722	3.148	86.45
647	81	19	143	3.153	9.65	3.064	36.94
648	77	10	142	2.463	8.093	3.289	15.03
649	75	11	140	2.53	8.268	3.272	24.75
650	71	26	NA	3.501	9.69	2.77	8.44
651	88	15	143	2.783	8.471	3.046	33.25
652	67	19	131	2.786	8.241	2.961	9.73
653	83	10	125	NA	NA	NA	NA
654	75	12	144	2.847	8.376	2.945	29.21
655	70	12	125	2.74	8.006	2.925	17.95
656	106	10	155	2.587	8.14	3.149	28.91
657	79	23	124	2.707	8.298	3.068	37.34
658	75	18	121	NA	NA	NA	NA
659	93	13	143	2.726	8.089	2.969	14.23
660	84	20	143	3.002	9.049	3.017	51.74
661	72	17	132	3.106	9.248	2.98	14.9
662	70	19	121	3.072	9.383	3.057	19.76
663	75	17	136	3.174	9.462	2.984	14.07
664	74	39	121	3.196	9.078	2.843	30.83
665	NA	NA	105	NA	NA	NA	NA
666	88	12	144	2.706	8.098	2.994	25.8
667	104	9	105	2.732	8.521	3.121	1.07
668	90	15	142	2.691	8.493	3.158	35.85
669	75	19	133	NA	NA	NA	NA
670	74	12	127	2.631	8.333	3.171	7.28
671	73	14	128	2.935	8.68	2.96	23.04
672	84	19	149	2.685	8.207	3.059	56.34
673	74	17	124	2.681	8.093	3.022	17.67
674	76	14	142	2.834	8.655	3.056	12.7
675	82	25	155	2.963	8.286	2.799	32.88
676	96	18	151	2.368	7.694	3.251	43.06
677	75	22	131	3.168	9.514	3.006	37.17
678	87	14	142	2.551	7.914	3.104	39.93
679	79	15	143	2.889	8.582	2.974	37.88
680	73	12	143	2.83	8.564	3.028	18.08
681	81	14	149	2.807	9.308	3.318	42.08
682	79	16	118	2.638	8.24	3.126	13.06
683	79	11	124	2.819	8.221	2.918	10.71
684	73	12	126	3.348	9.976	2.983	5.94
685	81	13	145	3.243	9.771	3.016	30.08
686	75	14	143	3.111	9.173	2.951	24.18
687	79	14	122	2.895	8.441	2.92	19.48
688	76	NA	116	NA	NA	NA	NA
689	80	NA	143	NA	NA	NA	NA
690	95	NA	149	2.585	8.152	3.156	32.97
691	81	13	155	2.596	8.399	3.237	31.96
692	87	14	147	3.051	9.452	3.101	34.65
693	54	4	118	3.249	9.788	3.015	1.35
694	91	NA	144	2.642	8.096	3.068	48.35
695	88	NA	141	2.726	7.87	2.889	17.61
696	86	NA	142	2.629	8.335	3.173	23.05
697	74	NA	126	2.487	8.126	3.268	18.77
698	70	9	108	2.785	8.258	2.967	6.26
699	82	NA	120	2.688	8.574	3.192	8.44
700	86	NA	130	2.607	8.015	3.076	9.63
701	85	NA	123	2.475	7.935	3.207	14.37
702	80	6	146	2.883	8.611	2.989	11.35
703	76	13	144	2.653	8.112	3.059	30.57
704	69	9	146	2.68	7.924	2.96	13.06
705	NA	NA	107	NA	NA	NA	NA
706	NA	NA	117	NA	NA	NA	NA
707	86	9	150	3.025	8.99	2.976	18.49
708	80	15	121	NA	NA	NA	NA
709	90	17	145	2.77	8.346	3.016	42.01
710	126	20	152	2.787	8.395	3.014	74.93
711	92	15	140	2.639	8.326	3.157	38.48
712	80	15	131	2.765	8.471	3.067	34.85
713	86	19	155	2.545	8.326	3.274	45.13
714	68	18	136	2.832	8.398	2.967	19.8
715	98	13	137	2.855	8.101	2.84	20.13
716	96	12	142	2.912	8.405	2.889	19.29
717	102	11	134	2.746	8.364	3.048	16.48
718	107	10	146	2.758	8.739	3.171	25.63
719	114	NA	NA	NA	NA	NA	NA
720	101	7	119	2.846	8.317	2.925	7.9
721	96	11	149	2.872	8.796	3.065	31.22
722	70	7	124	2.907	8.559	2.946	7.77
723	109	15	121	2.608	8.237	3.16	14.74
724	112	14	129	2.885	8.497	2.947	39.98
725	107	9	144	2.835	8.576	3.026	7.71
726	99	11	150	2.838	8.763	3.089	33.32
727	80	10	134	3.12	9.139	2.931	17.89
728	67	5	114	2.552	7.735	3.034	3.06
729	87	13	105	2.811	8.226	2.929	2.8
730	69	11	125	2.624	8.129	3.1	7.66
731	67	16	116	3.171	9.336	2.947	25.09
732	97	6	143	2.729	8.355	3.063	11.46
733	96	10	121	2.801	8.507	3.039	4.74
734	84	8	142	2.839	8.256	2.91	13.68
735	100	6	136	3.196	9.257	2.898	10.83
736	80	7	121	3.378	9.382	2.78	1.09
737	64	7	129	2.925	8.446	2.89	2.19
738	74	12	136	2.69	8.026	2.985	27.29
739	116	10	152	NA	NA	NA	NA
740	84	11	149	3	9.108	3.037	24.4
741	53	NA	120	NA	NA	NA	NA
742	88	43	132	2.933	8.38	2.86	17.6
743	92	20	NA	2.612	8.277	3.172	70.49
744	87	10	108	2.752	8.17	2.97	8.18
745	112	12	134	3.545	9.683	2.734	12.32
746	76	6	148	2.591	8.441	3.26	11.54
747	98	10	114	2.559	7.75	3.031	5.36
748	86	10	149	2.84	9.071	3.196	23.75
749	76	12	118	3.043	8.893	2.925	12.33
750	72	5	112	2.629	7.57	2.881	4.98
751	102	16	143	2.993	8.744	2.923	47.06
752	111	10	151	2.839	8.722	3.074	29.99
753	98	12	149	2.914	8.562	2.94	38.19
754	89	12	136	2.944	8.442	2.87	23.65
755	68	13	119	2.591	8.014	3.095	14.96
756	89	13	128	2.643	8.321	3.149	30.43
757	102	8	145	2.943	8.771	2.983	15.97
758	90	NA	122	NA	NA	NA	NA
759	117	6	151	2.606	8.251	3.167	5.35
760	87	12	129	2.796	8.721	3.121	17.14
761	118	15	145	2.924	9.153	3.131	36.39
762	82	15	118	3.082	8.422	2.735	15.07
763	84	10	144	3.059	9.137	2.99	19.84
764	120	13	133	NA	NA	NA	NA
765	88	13	115	3.243	9.34	2.882	11.41
766	63	12	137	2.621	8.169	3.119	4.27
767	77	20	130	2.595	8.119	3.131	24.37
768	86	12	126	3.064	9.143	2.986	8.4
769	87	11	155	2.879	9.12	3.172	23.05
770	131	12	150	2.686	8.092	3.015	37
771	115	9	153	2.727	8.145	2.989	14.58
772	89	14	127	2.711	8.113	2.995	13.52
773	110	14	150	2.919	8.825	3.025	45.74
774	60	13	NA	2.476	8.053	3.255	28.03
775	110	9	143	2.728	8.188	3.003	20.51
776	132	13	148	3.081	8.956	2.909	25.27
777	116	10	148	2.54	7.889	3.109	23.59
778	75	19	144	3.023	9.401	3.113	70.19
779	63	8	117	2.88	7.942	2.761	8.21
780	69	9	149	2.793	8.681	3.11	17.88
781	112	10	NA	2.62	8.473	3.236	28.29
782	96	12	144	2.839	7.971	2.809	26.97
783	105	16	127	2.676	8.344	3.12	38.26
784	85	10	118	2.655	8.038	3.029	5.11
785	107	4	149	2.966	9.153	3.086	9.49
786	118	11	135	2.876	8.039	2.798	9.62
787	95	11	NA	2.773	8.428	3.042	19.66
788	106	20	144	2.918	8.59	2.946	47.69
789	73	10	143	NA	NA	NA	NA
790	95	11	137	2.986	8.862	2.97	22.96
791	88	2	NA	NA	NA	NA	NA
792	120	14	150	2.826	8.783	3.11	44.35
793	107	8	118	2.907	8.469	2.915	5.14
794	84	13	144	2.768	8.868	3.206	27.44
795	81	21	109	2.999	8.216	2.742	5.35
796	99	15	124	NA	NA	NA	NA
797	89	8	137	3.202	9.11	2.847	8.62
798	82	12	117	2.91	8.701	2.992	24.78
799	123	12	144	2.638	8.195	3.108	19.28
800	76	11	106	3.072	8.565	2.789	4.28
801	71	7	134	2.651	8.302	3.136	1.83
802	63	11	134	NA	NA	NA	NA
803	120	9	148	NA	NA	NA	NA
804	102	10	140	2.813	8.259	2.938	24.19
805	125	16	147	2.897	8.766	3.028	45.78
806	71	9	143	3.142	9.301	2.962	13.47
807	74	12	127	2.648	8.645	3.266	4.01
808	102	9	145	2.634	8.057	3.06	21.95
809	79	11	132	NA	NA	NA	11.96
810	88	9	131	2.835	9.056	3.197	23.04
811	89	10	122	3.131	8.946	2.86	1.29
812	110	8	148	2.873	8.468	2.949	14.45
813	91	11	150	3.451	9.609	2.787	30.62
814	68	9	131	2.692	8.27	3.075	5.39
815	75	30	117	3.154	8.823	2.802	12.7
816	121	8	NA	2.994	8.889	2.971	25.45
817	81	12	117	2.797	8.689	3.109	2
818	100	12	130	2.736	8.088	2.958	16.43
819	83	8	133	2.988	8.593	2.878	13.05
820	90	24	119	2.839	7.891	2.782	17.92
821	108	16	144	2.865	8.407	2.937	48.96
822	87	23	126	3.14	8.964	2.857	10.59
823	45	5	146	NA	NA	NA	NA
824	108	20	140	2.554	7.811	3.06	53.78
825	87	12	152	2.857	8.621	3.019	11.86
826	83	12	118	2.943	8.554	2.908	5.44
827	110	10	152	2.59	7.865	3.039	19.92
828	68	12	120	2.77	8.04	2.904	9.41
829	98	15	142	2.894	8.169	2.825	34.56
830	91	12	123	2.819	7.975	2.831	17.63
831	71	14	141	2.809	8.169	2.91	12.55
832	117	10	144	3.399	9.383	2.763	24.62
833	97	12	151	2.771	8.355	3.017	33.86
834	82	14	141	NA	NA	NA	NA
835	108	19	132	2.982	9.112	3.058	14.75
836	95	30	113	3.156	9.218	2.923	6.51
837	79	20	132	2.705	8.321	3.079	17.12
838	63	5	127	2.763	8.787	3.182	0.86
839	100	14	116	3.16	9.331	2.955	19.65
840	83	17	144	2.803	8.429	3.011	18.4
841	71	12	107	2.613	8.744	3.348	37.49
842	108	12	148	2.764	8.469	3.066	23.13
843	73	12	142	2.666	8.102	3.04	21.35
844	119	16	141	2.688	7.903	2.943	18.72
845	69	8	149	2.797	8.231	2.946	6.61
846	117	7	151	2.816	9.002	3.198	24.99
847	90	22	122	2.976	8.211	2.762	23.61
848	64	10	115	3.247	9.176	2.829	1.99
849	112	13	145	2.826	8.469	2.998	17.26
850	85	19	110	2.915	8.462	2.905	7.35
851	95	23	111	3.083	8.595	2.79	15.96
852	124	22	145	3.032	8.497	2.805	50.7
853	112	49	130	2.675	8.387	3.138	28.69
854	97	15	119	2.971	8.615	2.901	28.54
855	100	27	127	2.784	8.127	2.921	20.75
856	100	26	123	3.255	9.004	2.768	24.96
857	120	15	150	NA	NA	NA	NA
858	93	26	136	3.04	9.18	3.022	10.15
859	109	26	111	3.103	8.633	2.784	18.64
860	101	22	111	2.813	8.497	3.023	10.44
861	103	9	143	3.299	9.146	2.775	5.28
862	118	18	146	2.676	8.373	3.13	48.2
863	129	14	156	3.064	9.456	3.089	31.35
864	121	22	150	2.843	8.449	2.974	76.13
865	103	11	142	2.889	8.426	2.918	16.23
866	119	12	150	2.818	8.513	3.023	33.8
867	95	13	153	2.59	7.827	3.024	30.16
868	125	14	150	3.25	9.322	2.87	41.56
869	73	20	124	3.095	9.128	2.955	6.52
870	89	11	110	3.024	8.896	2.945	3.72
871	77	3	122	NA	NA	NA	0.64
872	105	17	140	NA	NA	NA	48.88
873	97	15	NA	2.568	7.936	3.094	38.17
874	69	30	125	2.866	8.31	2.902	10.96
875	121	10	143	2.891	8.493	2.942	26.7
876	76	20	114	3.083	8.739	2.838	1.64
877	86	16	145	2.791	8.331	2.987	38.68
878	82	20	125	NA	NA	NA	NA
879	86	21	134	2.698	7.918	2.936	38.68
880	63	19	116	3.012	8.131	2.701	7.71
881	121	20	116	2.836	8.458	2.983	29.27
882	95	13	123	2.754	8.71	3.166	29.94
883	89	16	153	2.933	9.373	3.198	40.68
884	99	17	136	2.758	7.758	2.816	38.68
885	103	27	112	2.623	7.674	2.928	20.66
886	78	19	117	2.591	8.09	3.125	9.41
887	70	19	131	3.132	9.065	2.897	6.4
888	97	10	134	3.263	8.986	2.757	11.21
889	90	23	121	2.808	8.327	2.968	47.7
890	76	23	120	2.775	8.254	2.976	16.77
891	91	25	118	2.898	8.541	2.949	18.3
892	88	9	154	3.054	9.634	3.157	9.8
893	76	14	114	2.835	8.442	2.98	8.03
894	97	10	126	2.553	7.854	3.078	19.55
895	125	20	146	2.893	8.948	3.094	68.82
896	63	13	112	2.752	8.184	2.976	2.07
897	73	16	124	2.629	8.294	3.156	0.71
898	95	11	145	2.898	8.223	2.839	18.36
899	88	11	125	2.907	8.886	3.06	19.31
900	75	10	119	NA	NA	NA	NA
901	102	22	142	2.81	8.609	3.065	62.96
902	96	12	147	NA	NA	NA	NA
903	105	11	142	2.714	8.012	2.953	10.03
904	123	16	144	2.653	8.283	3.124	45.11
905	75	10	117	NA	NA	NA	NA
906	92	12	141	2.551	8.227	3.226	28.21
907	133	12	150	2.982	9.123	3.062	24.37
908	111	14	135	3.035	8.546	2.818	26.07
909	78	5	140	2.923	8.602	2.944	6.37
910	108	11	142	3.262	8.638	2.651	25.08
911	64	11	116	NA	NA	NA	NA
912	118	14	145	3.512	9.521	2.714	25.37
913	100	18	134	2.641	7.888	2.988	22.05
914	94	11	113	2.567	7.94	3.095	3.95
915	121	12	153	2.693	8.098	3.009	37.48
916	98	18	123	2.664	8.01	3.009	34.38
917	102	23	131	3.298	9.532	2.893	31.98
918	54	8	115	NA	NA	NA	NA
919	89	26	118	3.357	9.686	2.887	15.29
920	99	5	141	2.62	8.019	3.063	7.78
921	101	35	122	NA	NA	NA	NA
922	100	23	132	2.776	8.279	2.985	29.69
923	83	16	117	3.198	9.138	2.86	4.51
924	75	4	120	NA	NA	NA	NA
925	87	9	128	2.506	8.085	3.229	23.69
926	92	13	118	2.641	8.032	3.044	20.68
927	60	9	122	2.51	7.656	3.052	5.5
928	95	16	111	2.613	8.149	3.12	11.11
929	123	12	150	2.775	8.138	2.935	24.32
930	115	16	122	2.874	8.63	3.004	12.15
931	102	18	132	2.756	8.124	2.949	36.92
932	117	20	154	2.809	8.8	3.136	70.88
933	90	10	153	2.904	9.034	3.113	10.53
934	115	14	150	2.93	8.709	2.974	25.99
935	123	11	142	2.829	8.529	3.017	21.47
936	86	15	152	2.614	8.349	3.197	36.46
937	104	18	134	NA	NA	NA	NA
938	95	10	NA	NA	NA	NA	NA
939	92	17	124	2.689	8.432	3.138	24.88
940	101	17	117	3.11	9.18	2.955	11.49
941	96	10	128	2.883	8.312	2.885	23.19
942	72	17	120	3.217	9.375	2.917	39.55
943	71	15	123	2.762	8.622	3.123	13.84
944	91	16	150	2.676	8.437	3.155	48.71
945	68	13	NA	2.483	7.484	3.016	16.07
946	113	15	121	3.028	8.491	2.806	25.48
947	74	12	122	3.238	9.445	2.919	25.48
948	113	14	148	2.551	8.038	3.153	48.08
949	96	NA	146	2.748	8.178	2.978	41.62
950	89	20	121	2.742	8.395	3.064	12.06
951	103	NA	125	2.69	8.132	3.026	27.54
952	67	8	116	3.011	9.077	3.017	4.57
953	93	11	140	2.712	8.723	3.219	28.62
954	67	16	119	2.732	8.047	2.948	28.22
955	115	11	145	2.922	8.547	2.926	28.44
956	126	12	152	2.597	8.042	3.099	41.05
957	66	8	112	NA	NA	NA	NA
958	96	16	126	3.071	8.534	2.781	15.74
959	103	11	120	2.953	8.266	2.804	10.09
960	75	12	142	2.529	8.067	3.192	44.19
961	92	25	126	3.014	8.762	2.91	11.57
962	68	12	117	2.982	8.254	2.769	3.18
963	85	13	131	3.272	9.237	2.825	13.02
964	98	16	131	2.737	8.479	3.1	32.43
965	105	16	127	2.517	7.865	3.126	22.16
966	103	22	119	2.683	8.448	3.152	16.91
967	107	14	142	2.517	8.049	3.201	29.12
968	99	8	129	2.719	8.682	3.195	13.52
969	87	15	142	2.667	8.298	3.114	42.33
970	102	26	121	3.061	9.163	2.996	18.98
971	99	16	125	3.357	9.12	2.718	10.43
972	91	28	143	2.715	8.311	3.063	54.46
973	100	22	116	3.071	8.45	2.754	12.38
974	78	17	124	3.02	8.475	2.809	23.93
975	82	19	115	2.436	7.773	3.192	40.86
976	96	16	123	3.157	8.925	2.83	21.8
977	78	11	145	2.565	8.211	3.203	26.29
978	72	10	135	2.497	7.845	3.145	23.58
979	79	16	145	2.811	8.299	2.954	35.51
980	79	18	118	NA	NA	NA	NA
981	78	15	114	2.745	8.457	3.084	14.36
982	100	12	126	2.98	9.152	3.096	26.99
983	95	16	126	2.918	8.653	2.966	8.95
984	120	10	144	2.875	8.52	2.965	26.99
985	68	1	128	2.845	7.859	2.767	0.15
986	106	19	119	2.946	8.782	2.983	11.84
987	90	4	125	3.044	8.721	2.879	6.63
988	65	20	122	2.991	9.317	3.117	20.24
989	88	25	122	2.755	8.006	2.908	27.05
990	71	4	143	2.609	8.149	3.128	0.11
991	94	7	149	3.242	8.95	2.763	11.94
992	126	7	NA	3.222	9.864	3.064	20.29
993	86	13	122	2.752	8.848	3.216	5.83
994	69	9	128	3.083	8.353	2.711	6.07
995	93	7	145	2.947	8.413	2.857	5.01
996	108	10	127	2.841	8.334	2.935	1.74
997	100	9	123	NA	NA	NA	NA
998	96	33	125	2.824	8.454	2.996	28.56
999	100	14	142	2.999	8.433	2.815	27.8
1000	71	19	133	2.651	7.902	2.985	6.48
1001	55	8	110	3.151	8.552	2.717	0.85
1002	85	2	136	NA	NA	NA	NA
1003	90	15	129	2.87	8.292	2.892	18.01
1004	77	NA	124	2.84	7.923	2.792	2.82
1005	123	NA	143	3.007	8.392	2.793	9.55
1006	94	17	151	2.753	8.56	3.112	28.45
1007	98	14	132	3.121	8.936	2.866	10.08
1008	115	12	127	2.839	8.054	2.839	15.71
1009	55	7	122	NA	NA	NA	NA
1010	89	3	117	NA	NA	NA	NA
1011	105	7	151	2.745	8.882	3.238	22.12
1012	94	23	118	NA	NA	NA	NA
1013	69	10	128	2.722	8.221	3.023	8.58
1014	73	17	120	2.894	8.809	3.047	7.52
1015	99	22	132	3.082	8.611	2.796	14.4
1016	87	5	151	2.599	7.895	3.04	3.37
1017	82	18	130	2.797	8.235	2.947	12.56
1018	122	15	155	2.788	8.617	3.092	55.58
1019	107	12	142	2.417	7.414	3.069	17.42
1020	81	16	121	3.03	8.509	2.81	8.58
1021	89	22	107	3.231	8.632	2.673	4.18
1022	81	8	150	2.77	8.397	3.034	12.17
1023	115	15	141	3.204	8.589	2.683	38.3
1024	90	25	137	2.738	8.091	2.957	25.38
1025	63	28	135	2.851	8.559	3.005	25.36
1026	91	23	121	2.722	7.971	2.929	17.48
1027	105	8	142	2.645	7.461	2.824	9.62
1028	89	19	NA	2.887	8.207	2.844	9.5
1029	91	16	145	3.236	8.735	2.703	14.38
1030	85	16	136	3.044	8.532	2.805	27.6
1031	117	13	114	2.956	8.47	2.869	5.56
1032	124	11	151	NA	NA	NA	NA
1033	124	11	143	3.212	8.986	2.799	9.59
1034	91	9	142	3.081	8.637	2.805	24.78
1035	110	18	146	2.759	8.617	3.126	57.64
1036	81	10	146	2.522	7.773	3.086	14.81
1037	85	16	113	2.78	8.256	2.971	15.12
1038	89	19	135	3.045	8.679	2.853	8.81
1039	113	19	125	3.063	8.768	2.865	14.9
1040	89	13	147	2.611	8.158	3.127	24.75
1041	85	9	122	2.71	7.877	2.908	6.9
1042	118	10	150	3.088	9.091	2.946	23.13
1043	131	15	141	3.044	8.548	2.81	30.13
1044	92	19	128	2.901	8.063	2.781	16.4
1045	94	16	134	2.997	8.488	2.835	13.18
1046	127	17	141	3.476	9.487	2.732	50.85
1047	96	11	145	NA	NA	NA	NA
1048	129	11	141	2.9	8.337	2.877	17.35
1049	87	10	125	2.895	8.722	3.015	4.94
1050	125	21	150	2.935	8.341	2.844	62.93
1051	92	17	135	3.32	9.089	2.743	31.73
1052	114	7	141	2.735	8.026	2.938	10.99
1053	78	10	115	3.022	8.656	2.867	NA
1054	89	11	137	2.793	8.325	2.983	26.2
1055	67	13	133	2.492	7.667	3.08	17.62
1056	107	12	150	2.89	8.655	2.998	38.43
1057	78	16	144	NA	NA	NA	NA
1058	99	11	120	2.778	8.491	3.058	17.79
1059	61	8	127	2.708	8.186	3.024	5.8
1060	75	12	148	3.402	9.422	2.772	21.97
1061	80	22	128	3.015	9.338	3.101	17.01
1062	120	21	128	2.645	8.086	3.059	29.71
1063	114	10	146	2.834	8.245	2.912	24.51
1064	87	10	124	2.803	8.197	2.927	18.72
1065	96	14	135	NA	NA	NA	NA
1066	106	10	142	2.679	8.593	3.21	32.28
1067	118	10	151	2.804	8.47	3.023	34.58
1068	138	10	NA	3.338	9.56	2.867	29.78
1069	70	7	131	2.879	8.821	3.066	11.79
1070	114	15	116	2.678	8.275	3.092	11.52
1071	103	12	146	2.956	8.393	2.84	3.43
1072	77	15	131	2.761	8.756	3.174	23.42
1073	83	11	135	NA	NA	NA	NA
1074	109	18	145	2.854	8.378	2.937	42.56
1075	89	15	146	2.681	8.268	3.087	40.16
1076	109	11	142	3.04	8.883	2.924	26.12
1077	112	11	143	3.131	8.98	2.87	31.68
1078	92	10	149	2.841	8.236	2.901	14.46
1079	116	17	149	2.745	8.442	3.078	52.13
1080	109	18	142	2.695	8.196	3.043	57.93
1081	100	14	148	3.019	8.861	2.938	37.57
1082	120	12	144	2.852	8.235	2.891	20.17
1083	80	30	122	3.512	9.467	2.699	18.49
1084	70	9	142	2.72	7.94	2.925	9.68
1085	94	19	134	2.56	8.075	3.157	54.66
1086	95	8	124	3.21	9.256	2.886	14.53
1087	95	7	141	2.687	8.259	3.078	9.15
1088	77	12	124	2.862	8.531	2.984	9.51
1089	86	19	143	3.123	8.45	2.71	7.45
1090	76	16	142	2.728	8.344	3.062	35.2
1091	100	13	136	2.51	8.179	3.261	21.37
1092	102	17	126	2.673	8.184	3.065	32.89
1093	85	13	149	3.131	9.394	3.003	21.76
1094	122	25	145	NA	NA	NA	NA
1095	93	19	126	NA	NA	NA	36.98
1096	62	9	125	2.484	7.764	3.129	5.18
1097	110	15	146	2.603	8.165	3.139	34.36
1098	100	17	134	NA	NA	NA	NA
1099	NA	NA	130	NA	NA	NA	NA
1100	110	18	147	2.777	8.558	3.084	62.88
1101	89	14	144	2.801	8.378	2.994	32.36
1102	135	11	145	2.824	8.209	2.91	32.86
1103	120	14	149	2.649	8.263	3.121	43.21
1104	98	21	122	2.967	8.353	2.817	47.8
1105	85	16	149	2.588	8.515	3.293	46.15
1106	89	13	134	2.725	8.033	2.95	35.28
1107	90	17	125	2.87	8.666	3.022	49.57
1108	96	12	145	2.935	8.551	2.916	19.2
1109	99	19	130	2.956	8.325	2.818	60.7
1110	87	7	119	3.047	8.778	2.884	10.54
1111	70	13	119	2.665	8.268	3.105	20.53
1112	92	20	112	2.891	8.186	2.838	20.31
1113	98	10	142	2.582	7.692	2.982	13.36
1114	90	28	118	NA	NA	NA	NA
1115	79	16	142	NA	NA	NA	NA
1116	85	13	118	2.522	7.977	3.167	18.99
1117	70	NA	108	2.515	8.043	3.202	0.48
1118	113	11	150	2.618	8.47	3.238	32.49
1119	117	25	142	2.661	8.267	3.112	48.93
1120	105	13	134	2.786	8.005	2.875	30.85
1121	95	23	130	2.805	8.613	3.075	15.19
1122	82	17	125	2.983	8.503	2.854	6.7
1123	97	21	108	2.464	7.888	3.205	17.59
1124	93	15	131	2.778	8.693	3.134	41.74
1125	74	8	143	3.15	9.579	3.044	17.69
1126	83	6	113	2.787	8.473	3.041	2.84
1127	72	14	143	2.505	8.057	3.22	31.24
1128	84	11	151	2.919	8.655	2.968	34.71
1129	94	21	146	3.091	8.97	2.904	60.69
1130	88	10	130	2.92	8.71	2.985	25.19
1131	94	25	122	2.781	8.717	3.139	13.82
1132	66	15	113	2.782	8.593	3.093	6.57
1133	83	29	119	2.834	8.073	2.851	23.68
1134	69	11	142	NA	NA	NA	NA
1135	117	5	NA	2.915	8.507	2.923	7.84
1136	94	15	113	2.956	8.788	2.977	28.46
1137	96	24	115	2.818	8.278	2.946	18.73
1138	92	25	110	NA	NA	NA	NA
1139	90	8	142	2.748	8.575	3.131	16.08
1140	105	14	132	3.493	9.531	2.734	18.42
1141	118	26	117	2.555	8.298	3.266	65.6
1142	85	13	120	2.964	8.477	2.865	32.05
1143	112	12	144	2.829	8.513	3.014	19.56
1144	95	30	116	3.08	8.536	2.783	24.6
1145	101	23	115	3.009	8.293	2.759	9.02
1146	95	27	111	2.762	8.352	3.025	11.99
1147	83	11	153	2.903	9.314	3.216	41
1148	78	9	112	2.945	8.4	2.855	5.42
1149	97	13	107	2.646	8.142	3.079	31.3
1150	93	17	127	2.645	8.135	3.08	14.11
1151	107	NA	116	3.016	8.822	2.946	40.97
1152	70	11	131	2.821	8.535	3.031	6.5
1153	97	8	117	3.035	8.718	2.874	11.1
1154	92	14	129	2.859	8.24	2.886	28.11
1155	115	13	143	2.677	8.578	3.208	35.17
1156	100	41	130	2.957	8.208	2.784	18
1157	81	9	118	NA	NA	NA	NA
1158	91	13	128	2.692	8.372	3.112	26.75
1159	99	24	145	3.123	8.752	2.807	72.02
1160	111	11	NA	2.769	7.9	2.855	26.91
1161	105	13	148	3.068	8.982	2.93	31.86
1162	100	10	133	2.732	8.184	2.998	30.44
1163	94	6	118	2.737	8.238	3.012	4.87
1164	98	23	143	2.861	8.787	3.074	48.57
1165	97	19	143	2.966	8.563	2.89	54.92
1166	96	13	128	2.712	8.519	3.147	16.65
1167	82	24	123	2.925	8.185	2.802	26.72
1168	83	21	150	3.149	9.252	2.94	56.16
1169	69	18	141	2.838	8.276	2.919	15.43
1170	89	13	151	2.972	9.199	3.097	32.84
1171	110	27	142	3.011	8.747	2.911	63.97
1172	78	12	142	2.819	8.58	3.046	29.47
1173	115	12	126	2.929	8.636	2.958	20.3
1174	79	NA	144	2.936	8.783	2.993	36.48
1175	95	13	131	2.575	8.076	3.138	39.09
1176	107	14	114	NA	NA	NA	29.41
1177	90	21	114	3.233	9.092	2.812	14.03
1178	72	27	125	2.869	8.107	2.83	25.14
1179	88	10	118	2.799	8.008	2.863	13.62
1180	116	13	145	2.761	8.387	3.042	46.35
1181	76	17	133	2.905	8.946	3.108	21.77
1182	104	13	141	2.632	8.106	3.081	25.51
1183	106	17	144	2.689	8.755	3.259	54.45
1184	89	10	110	3.136	9.03	2.883	14.96
1185	91	13	137	3.137	9.522	3.045	38.21
1186	84	7	118	NA	NA	NA	NA
1187	103	26	133	2.707	8.172	3.023	21.77
1188	79	6	117	2.836	7.995	2.823	25.51
1189	117	22	142	2.54	7.678	3.026	46.12
1190	88	11	NA	3.282	9.237	2.823	30.66
1191	86	11	146	NA	NA	NA	NA
1192	77	8	129	2.621	8.06	3.077	15.28
1193	125	11	145	2.909	8.621	2.966	30.76
1194	95	17	128	2.961	8.592	2.912	15.94
1195	110	19	137	2.663	7.974	2.997	42.14
1196	91	19	135	2.695	8.359	3.106	38.13
1197	69	7	150	3.231	9.135	2.831	9.38
1198	85	10	145	2.608	8.2	3.147	18.89
1199	117	14	146	2.829	8.399	2.981	40.71
1200	102	17	148	2.693	8.257	3.068	48.73
1201	93	8	112	2.923	8.667	2.968	9.98
1202	106	13	142	2.989	8.674	2.907	24.43
1203	78	25	124	2.939	8.563	2.923	24.46
1204	110	50	144	3.118	8.861	2.845	57.12
1205	99	11	120	2.898	8.538	2.952	13.87
1206	77	14	105	3.194	9.079	2.846	9.82
1207	92	16	150	2.641	8.207	3.111	42.74
1208	74	27	122	2.54	7.673	3.028	25.89
1209	66	10	140	2.829	8.435	2.983	12.32
1210	121	15	124	2.862	7.978	2.79	26.65
1211	92	10	113	2.814	8.251	2.937	8.28
1212	67	15	120	3.066	9.015	2.944	24.87
1213	110	21	140	2.987	8.779	2.947	19.87
1214	68	15	139	2.803	8.591	3.068	27.35
1215	117	22	150	2.731	8.707	3.194	73.35
1216	125	12	149	2.808	7.921	2.823	28.58
1217	94	9	118	3.079	9.257	3.011	13.05
1218	92	14	134	2.996	8.773	2.932	18.58
1219	92	14	112	2.972	8.17	2.753	15.17
1220	102	13	135	2.87	8.492	2.962	31.68
1221	96	18	143	3.025	8.729	2.91	30.6
1222	65	12	NA	2.947	8.122	2.76	6.78
1223	89	11	131	2.661	8.452	3.179	22.52
1224	112	11	114	3.039	8.619	2.844	19.6
1225	80	11	138	2.719	8.156	3.004	17.09
1226	92	22	125	2.749	8.177	2.977	18.76
1227	70	8	121	2.69	8.26	3.073	8.27
1228	76	10	117	2.69	8.38	3.117	11.46
1229	94	13	133	2.717	8.3	3.059	33.69
1230	89	16	121	2.669	8.07	3.025	14.3
1231	113	25	142	2.715	8.373	3.087	NA
1232	90	17	114	NA	NA	NA	39.03
1233	81	13	150	2.809	8.453	3.012	27.64
1234	88	8	108	3.032	8.514	2.812	8.88
1235	98	19	125	2.949	8.618	2.925	43.79
1236	78	31	117	3.08	8.647	2.812	43.31
1237	98	12	130	2.68	8.093	3.024	21.82
1238	112	8	151	3.037	9.262	3.054	13.92
1239	95	12	127	2.991	8.872	2.972	17.21
1240	61	7	133	3.219	9.171	2.85	4.99
1241	108	14	146	2.681	7.915	2.955	36.79
1242	89	25	105	3.072	8.739	2.852	19.69
1243	110	23	142	2.675	8.041	3.016	44.62
1244	88	14	127	2.686	8.288	3.09	18.03
1245	112	18	121	3.034	8.311	2.744	28.54
1246	105	22	139	2.441	7.826	3.209	37.4
1247	84	13	134	3.108	9.358	3.013	17.72
1248	75	21	109	3.286	9.449	2.878	17.4
1249	110	12	151	2.788	8.575	3.079	38.67
1250	94	30	125	2.887	8.355	2.897	36.87
1251	112	16	140	3.022	8.412	2.786	36.28
1252	83	15	134	2.878	9.037	3.145	25.83
1253	91	26	105	3.031	8.76	2.898	26.33
1254	80	21	143	2.75	8.423	3.066	72.36
1255	122	16	134	2.709	8.353	3.084	35.72
1256	110	13	144	2.99	8.61	2.882	10.03
1257	118	10	151	3.053	9.3	3.05	28.72
1258	90	14	119	3.052	8.731	2.865	21.12
1259	75	15	120	3.34	9.206	2.76	0.24
1260	101	17	141	2.711	7.92	2.923	42.85
1261	94	13	130	2.675	7.929	2.971	27.83
1262	103	10	150	2.766	8.249	2.985	28.26
1263	98	16	120	NA	NA	NA	NA
1264	104	13	127	2.822	8.134	2.885	30.73
1265	83	20	142	2.724	8.236	3.025	38.64
1266	98	10	115	2.943	8.774	2.984	9.63
1267	92	8	136	2.996	9.38	3.134	20.99
1268	107	11	142	NA	NA	NA	NA
1269	111	12	155	2.517	8.012	3.187	9.16
1270	110	11	120	NA	NA	NA	NA
1271	110	13	NA	3.261	9.772	3.003	40.05
1272	105	15	140	2.839	8.558	3.018	42.6
1273	106	11	141	2.439	7.653	3.141	25.01
1274	98	10	147	NA	NA	NA	NA
1275	117	11	155	3.08	9.236	3.002	24.14
1276	80	19	123	2.847	8.098	2.849	13.46
1277	72	10	NA	NA	NA	NA	NA
1278	79	11	127	2.583	8.171	3.166	18.95
1279	105	10	140	2.618	8.71	3.33	19.43
1280	80	9	143	2.657	7.79	2.934	17.22
1281	99	13	144	3.236	9.192	2.843	23.83
1282	97	15	141	3.244	9.528	2.939	32.55
1283	95	14	143	2.843	8.421	2.965	13.97
1284	121	17	142	2.866	8.744	3.055	55.7
1285	93	9	125	2.722	8.328	3.062	14.17
1286	117	11	149	3.225	9.113	2.827	36.24
1287	95	18	117	3.048	8.639	2.837	4.44
1288	72	10	128	2.53	7.834	3.098	18.52
1289	109	15	142	2.693	8.087	3.007	31.08
1290	62	25	143	2.997	8.406	2.81	17.99
1291	137	11	144	2.538	8.193	3.233	42.95
1292	73	12	143	2.727	8.535	3.132	24
1293	101	15	110	3.079	8.938	2.906	10.65
1294	92	9	150	2.546	8.338	3.278	32.13
1295	112	14	126	2.902	8.579	2.959	25.83
1296	67	21	110	3.311	9.414	2.847	22.15
1297	121	14	142	2.724	7.842	2.881	26.24
1298	101	9	145	2.519	8.032	3.19	22.2
1299	116	14	142	NA	NA	NA	NA
1300	97	11	141	2.751	8.074	2.936	25.51
1301	96	10	147	2.629	8.46	3.22	31.16
1302	102	17	148	2.943	9.544	3.247	48.64
1303	89	12	150	3.035	8.566	2.826	17.35
1304	108	14	148	3.142	9.186	2.927	42.52
1305	105	11	140	2.814	8.369	2.979	15.92
1306	88	18	115	3.041	8.985	2.96	14.84
1307	101	13	146	3.064	8.975	2.934	36.21
1308	111	18	150	2.68	8.441	3.151	63.43
1309	90	15	119	2.853	8.473	2.972	13.12
1310	66	14	126	2.89	8.299	2.878	12.65
1311	95	10	141	2.922	8.597	2.945	27.43
1312	90	10	142	2.671	8.453	3.167	13.68
1313	95	15	132	2.763	8.249	2.988	9.96
1314	116	20	153	2.791	8.42	3.018	58.36
1315	95	21	145	2.901	8.803	3.056	64.67
1316	65	15	129	3.007	9.043	3.01	6.96
1317	75	5	148	3.166	9.212	2.913	9.55
1318	70	14	148	2.551	8.235	3.232	26.24
1319	109	10	145	2.689	8.054	2.997	28.4
1320	110	23	119	2.918	8.575	2.944	54.9
1321	105	11	149	2.695	8.754	3.25	41.53
1322	63	16	120	2.675	8.258	3.099	20.15
1323	84	12	NA	3.351	9.371	2.806	30.8
1324	86	9	143	2.575	7.682	2.986	27.22
1325	92	12	118	2.629	7.856	2.993	7.16
1326	95	15	140	3.408	9.506	2.793	28.89
1327	98	13	154	2.936	8.356	2.848	42.18
1328	116	13	145	3.055	8.563	2.805	35.39
1329	87	13	155	2.862	8.637	3.021	36.67
1330	94	10	119	3.385	9.39	2.781	9.19
1331	98	9	146	2.894	8.746	3.024	20.26
1332	103	16	145	2.83	8.368	2.959	45.29
1333	111	13	149	3.116	9.371	3.01	22.94
1334	88	12	122	3.265	8.879	2.722	7.09
1335	57	23	119	2.534	8.23	3.252	11.65
1336	102	10	143	2.503	7.359	2.943	17.2
1337	85	13	153	2.803	8.562	3.057	35.55
1338	94	18	140	2.788	8.15	2.926	19.42
1339	115	15	128	3.058	8.429	2.759	29.56
1340	103	8	119	2.855	8.4	2.944	5.6
1341	102	9	149	2.858	8.67	3.036	18.98
1342	124	15	148	2.828	8.681	3.071	47.1
1343	65	14	142	NA	NA	NA	NA
1344	106	19	151	2.839	9.446	3.33	60.82
1345	82	14	142	2.716	8.072	2.976	28.89
1346	125	12	149	3.159	9.777	3.096	46.47
1347	87	13	142	2.903	8.189	2.824	15.91
1348	92	11	123	NA	NA	NA	NA
1349	84	8	139	2.387	7.482	3.138	3.7
1350	100	23	135	2.598	8.242	3.174	79.37
1351	116	15	145	NA	NA	NA	NA
1352	64	12	139	2.778	8.593	3.096	19.99
1353	80	13	150	2.742	8.273	3.022	30.23
1354	80	14	142	2.536	7.729	3.052	17.74
1355	108	13	145	2.682	8.041	3	44.14
1356	108	15	122	2.803	8.206	2.93	25.53
1357	92	6	155	2.517	8.587	3.416	19.72
1358	82	4	117	2.887	8.267	2.866	1.03
1359	86	9	147	2.828	8.198	2.902	13.5
1360	128	11	150	2.827	8.667	3.068	26.53
1361	95	17	133	3.299	9.171	2.787	35.73
1362	88	14	117	3.253	8.971	2.759	2.8
1363	116	13	155	2.47	8.078	3.272	33.5
1364	118	16	152	3.139	9.275	2.957	40.67
1365	70	17	122	2.791	8.108	2.908	11.09
1366	118	12	145	2.695	7.885	2.928	18.44
1367	95	9	142	3.092	8.704	2.817	19.63
1368	94	20	143	2.845	7.978	2.807	22.99
1369	106	15	139	2.612	8.312	3.185	31.96
1370	94	11	146	2.59	8.586	3.318	33.37
1371	94	11	114	3.288	8.713	2.653	6.3
1372	89	14	142	3.045	8.644	2.842	19.6
1373	87	9	143	2.645	7.816	2.958	16.11
1374	122	15	151	2.563	7.845	3.064	54.07
1375	92	9	143	2.565	8.007	3.124	16.94
1376	70	13	140	3.155	9.314	2.955	22.77
1377	85	12	141	2.763	8.341	3.022	2.71
1378	82	16	122	NA	NA	NA	NA
1379	94	15	145	2.742	8.59	3.137	36.86
1380	95	16	114	NA	NA	NA	NA
1381	95	29	134	2.915	8.201	2.817	29.59
1382	85	8	139	2.85	8.01	2.814	14.7
1383	78	12	117	2.898	8.431	2.911	15.47
1384	83	9	144	3.053	8.676	2.845	10.89
1385	102	22	134	2.845	8.054	2.833	47.83
1386	83	13	124	2.937	8.849	3.017	10.96
1387	76	10	148	NA	NA	NA	NA
1388	106	9	153	2.594	8.471	3.268	33.67
1389	87	10	134	3.237	9.159	2.832	7.51
1390	120	6	139	2.779	8.443	3.039	5.29
1391	88	13	150	2.676	8.245	3.085	32.76
1392	109	12	139	2.783	8.015	2.882	37.5
1393	73	NA	121	2.98	8.428	2.832	13.01
1394	81	11	144	3.079	9.017	2.931	22.59
1395	63	6	125	3.328	9.459	2.847	4.1
1396	95	12	130	2.698	8.453	3.136	25.54
1397	71	8	121	2.908	8.702	2.994	6.29
1398	82	12	151	2.856	8.135	2.851	33.59
1399	80	6	145	NA	NA	NA	NA
1400	114	14	125	2.869	9.079	3.164	27.56
1401	77	9	142	2.744	7.93	2.892	21.92
1402	109	10	152	2.55	8.218	3.226	18.28
1403	57	3	132	2.893	9.268	3.204	2.31
1404	76	NA	143	NA	NA	NA	NA
1405	106	14	149	3.333	9.286	2.791	19.02
1406	110	23	151	2.946	9.375	3.185	66.19
1407	103	12	142	3.083	8.783	2.853	16.24
1408	111	9	138	2.602	7.955	3.061	21.71
1409	86	10	152	3.151	9.602	3.051	23.37
1410	82	5	149	2.981	8.879	2.981	12.11
1411	84	NA	128	NA	NA	NA	NA
1412	106	NA	143	2.509	8.188	3.266	5.81
1413	105	14	149	2.735	8.459	3.095	40.13
1414	109	19	126	2.751	8.646	3.15	25.8
1415	80	NA	108	3.414	9.497	2.785	14.44
1416	104	NA	148	2.981	8.761	2.941	13.4
1417	81	NA	143	2.736	8.314	3.042	66.69
1418	103	12	140	NA	NA	NA	27.32
1419	82	14	145	2.988	8.727	2.924	36.01
1420	73	9	139	2.715	8.162	3.009	10.8
1421	101	NA	122	NA	NA	NA	NA
1422	82	NA	155	3.097	9.007	2.912	42.94
1423	108	NA	148	NA	NA	NA	NA
1424	135	8	157	2.754	8.808	3.201	30.56
1425	108	12	143	2.978	8.589	2.887	20.81
1426	89	10	143	3.061	8.585	2.807	15.91
1427	77	14	146	NA	NA	NA	38.21
1428	87	12	151	2.714	8.182	3.019	16.78
1429	101	9	139	2.718	8.269	3.046	41.78
1430	108	18	120	2.634	8.263	3.14	21.76
1431	52	6	142	2.73	8.461	3.102	2.37
1432	105	15	139	NA	NA	NA	NA
1433	90	14	139	2.948	8.731	2.965	31.62
1434	99	20	151	3.102	8.888	2.867	64.06
1435	114	11	151	2.684	8.312	3.098	41.48
1436	92	13	139	3.179	9.223	2.903	19.99
1437	70	10	140	2.676	8.041	3.007	24
1438	108	12	144	2.84	8.677	3.057	35.6
1439	103	13	145	2.854	8.032	2.816	23.79
1440	88	15	128	2.807	7.966	2.841	18.59
1441	94	16	112	NA	NA	NA	NA
1442	92	18	136	NA	NA	NA	NA
1443	105	12	139	2.956	8.273	2.802	10.5
1444	117	8	149	2.745	8.501	3.099	28.34
1445	121	20	144	3.079	8.51	2.767	28.34
1446	82	13	140	3.093	9.256	2.996	20.33
1447	116	12	150	2.684	8.711	3.249	26.84
1448	117	4	112	2.684	8.443	3.148	8.54
1449	117	16	146	2.857	8.67	3.037	45.8
1450	115	14	146	2.595	8.011	3.09	30.82
1451	102	11	142	2.554	8.335	3.266	30.82
1452	77	4	141	3.056	9.134	2.991	4.18
1453	90	8	142	NA	NA	NA	11.45
1454	83	12	142	2.775	8.188	2.954	21.59
1455	92	12	142	2.958	9.054	3.064	27.11
1456	94	8	141	2.772	8.608	3.108	16.04
1457	119	17	126	2.778	8.696	3.132	51.95
1458	107	7	142	2.752	8.06	2.932	12.89
1459	109	14	151	2.728	8.33	3.055	34.68
1460	86	15	145	3.122	9.256	2.968	29.31
1461	90	7	132	2.927	8.369	2.862	11.89
1462	70	9	114	2.995	8.873	2.968	5.55
1463	108	21	147	3.156	9.534	3.025	67.29
1464	104	20	143	2.792	8.256	2.96	69.19
1465	99	17	126	2.965	8.87	2.994	28.65
1466	79	8	142	3.032	8.952	2.957	11.13
1467	113	9	140	2.837	8.24	2.909	16.26
1468	88	16	139	2.851	8.841	3.105	24.07
1469	88	15	145	2.769	8.257	2.984	30.13
1470	103	11	116	3.186	8.842	2.777	12
1471	88	16	136	2.951	8.573	2.908	18.67
1472	112	10	149	3.022	8.815	2.922	35.73
1473	97	9	142	2.78	8.475	3.051	12.25
1474	101	18	141	3.041	8.839	2.908	52.2
1475	108	9	149	2.649	7.806	2.949	22.5
1476	100	14	148	3.031	8.927	2.947	51.65
1477	110	10	143	2.904	8.474	2.92	20.6
1478	99	9	144	2.707	8.168	3.019	30
1479	80	11	141	2.919	8.358	2.866	16.23
1480	101	15	143	2.434	8.061	3.314	42.65
1481	96	11	137	2.883	8.414	2.922	15.89
1482	93	10	NA	2.908	8.771	3.02	32.23
1483	85	10	143	NA	NA	NA	NA
1484	106	22	134	2.679	7.753	2.897	40.6
1485	89	19	117	2.57	8.276	3.225	32.43
1486	95	NA	139	2.882	8.284	2.877	10.68
1487	94	16	125	2.835	8.183	2.889	15.06
1488	99	10	116	2.796	8.342	2.986	16.12
1489	78	20	140	2.872	8.448	2.944	35.69
1490	85	17	110	3.086	8.456	2.744	25.56
1491	102	13	133	3.315	9.205	2.779	11.7
1492	91	10	137	2.924	8.429	2.885	15.73
1493	87	11	119	3.467	9.786	2.825	13.21
1494	93	18	139	3.057	8.984	2.94	41.25
1495	102	9	145	2.679	8.303	3.102	26.49
1496	116	9	153	2.996	8.921	2.979	17.25
1497	110	13	151	2.721	8.354	3.072	37.65
1498	92	13	141	2.792	8.692	3.116	33.52
1499	82	5	139	3.091	8.616	2.79	2.37
1500	79	21	143	3.205	9.158	2.86	38.31
1501	81	18	143	2.764	8.04	2.913	31.6
1502	97	14	139	2.679	8.155	3.048	40.45
1503	86	NA	137	NA	NA	NA	NA
1504	74	3	110	NA	NA	NA	NA
1505	94	7	141	3.004	8.644	2.88	10.12
1506	58	18	110	3.157	8.68	2.755	11.33
1507	93	NA	137	2.957	8.364	2.832	38.6
1508	98	11	147	2.732	8.449	3.094	29.01
1509	94	8	146	2.484	8.156	3.285	25.42
1510	96	10	143	2.893	8.626	2.983	26.58
1511	113	13	155	2.771	8.699	3.142	26.86
1512	117	15	139	2.769	8.157	2.948	35.5
1513	80	19	140	2.728	8.064	2.96	33.53
1514	79	9	143	2.756	8.287	3.009	14.12
1515	76	15	143	2.81	8.205	2.922	27.25
1516	107	23	142	2.625	8.168	3.114	62.03
1517	99	21	136	2.934	8.341	2.847	31.63
1518	84	19	146	2.732	8.131	2.98	34.58
1519	113	10	138	NA	NA	NA	NA
1520	84	9	149	2.521	8.483	3.368	25.92
1521	98	11	144	2.474	7.729	3.127	30.32
1522	113	25	141	3.524	9.32	2.647	36.2
1523	65	17	118	2.483	7.884	3.179	11.91
1524	115	12	119	2.957	8.604	2.912	40.54
1525	102	25	152	3.107	8.834	2.846	67.28
1526	75	25	143	3.113	8.894	2.859	NA
1527	66	15	106	3.062	8.868	2.9	18.38
1528	50	13	105	NA	NA	NA	NA
1529	82	7	134	2.783	8.411	3.027	6.59
1530	92	11	144	2.971	8.41	2.835	18.42
1531	104	12	146	3.132	8.969	2.865	38.69
1532	47	8	133	2.826	8.444	2.991	3.89
1533	97	14	143	2.787	8.166	2.932	26.26
1534	67	12	144	3.173	8.966	2.829	7.53
1535	118	14	149	2.966	9.02	3.042	45.31
1536	107	22	139	2.576	8.552	3.325	66.9
1537	74	13	143	2.658	8.672	3.265	30.05
1538	88	10	142	3.064	8.384	2.739	12.34
1539	84	11	143	2.78	8.312	2.992	25.87
1540	90	14	148	2.931	8.811	3.009	47.17
1541	64	16	116	3.093	8.969	2.902	20.04
1542	86	11	137	NA	NA	NA	NA
1543	96	14	140	2.854	8.434	2.958	13.97
1544	NA	NA	116	NA	NA	NA	NA
1545	98	18	140	2.851	9.37	3.29	49.98
1546	84	16	147	2.884	8.581	2.978	21.48
1547	86	13	141	2.744	8.684	3.167	23.29
1548	85	10	122	2.587	8.004	3.097	6.23
1549	96	17	141	2.68	8.549	3.194	68.8
1550	88	18	139	2.617	8.244	3.153	40.92
1551	101	9	138	2.881	8.28	2.878	13.41
1552	106	12	150	NA	NA	NA	NA
1553	127	12	153	3.102	9.698	3.129	45.14
1554	98	9	151	2.624	8.61	3.284	38.97
1555	134	13	144	2.732	8.146	2.985	49.63
1556	83	14	147	3.061	9.199	3.007	36.86
1557	75	14	142	2.854	8.4	2.947	20.17
1558	112	NA	117	3.345	9.161	2.742	16.83
1559	111	19	151	2.785	8.856	3.183	54.11
1560	108	17	145	3.329	9.418	2.833	46.72
1561	118	12	154	3.042	9.367	3.081	31.8
1562	101	9	146	2.861	8.364	2.925	18.02
1563	87	12	144	3.182	9.089	2.859	8.87
1564	82	13	151	2.664	8.453	3.176	36.32
1565	104	16	142	NA	NA	NA	NA
1566	92	13	140	2.638	7.837	2.972	27.3
1567	88	9	149	2.697	8.439	3.131	15.65
1568	82	18	139	3.152	8.87	2.818	14.15
1569	72	NA	110	2.771	8.283	2.992	18.39
1570	98	NA	140	2.561	8.445	3.299	17.71
1571	104	12	141	2.81	8.173	2.911	12.59
1572	79	4	143	2.707	8.687	3.211	1.73
1573	94	8	138	NA	NA	NA	NA
1574	91	16	142	2.913	8.561	2.942	35.43
1575	81	12	119	3.079	8.894	2.891	5.52
1576	92	10	119	2.767	8.884	3.215	12.9
1577	74	21	143	2.919	8.147	2.794	42.62
1578	104	NA	141	3.169	9.305	2.94	54.18
1579	91	10	139	3.322	9.396	2.831	18.54
1580	69	NA	139	2.679	8.411	3.142	17.73
1581	111	14	145	2.564	8.092	3.159	42.61
1582	75	11	106	3.377	9.481	2.813	12.14
1583	101	9	133	2.699	8.645	3.206	14.01
1584	78	16	136	3.06	9.263	3.032	14.6
1585	107	13	149	2.998	8.782	2.931	24.5
1586	79	9	142	3.128	8.88	2.843	8.7
1587	88	25	145	2.565	7.894	3.08	63.89
1588	103	17	142	2.83	8.284	2.93	48.36
1589	122	17	143	2.853	8.454	2.966	25.76
1590	81	17	151	2.715	8.632	3.182	45.78
1591	92	21	125	2.803	8.523	3.043	36.22
1592	90	19	134	3.248	9.341	2.879	23.06
1593	86	12	145	2.928	8.385	2.866	14.15
1594	101	14	144	2.453	7.844	3.2	39.32
1595	108	18	150	3.284	9.571	2.917	49.64
1596	74	12	137	3.435	9.454	2.754	11.74
1597	80	13	138	3.097	8.999	2.909	15.72
1598	102	14	125	2.874	8.64	3.011	14.85
1599	83	NA	143	NA	NA	NA	NA
1600	60	13	110	3.023	8.497	2.814	7.66
1601	80	NA	105	3.036	8.47	2.791	15.23
1602	93	15	105	NA	NA	NA	NA
1603	75	18	139	3.332	9.402	2.825	18.14
1604	80	17	140	3.132	8.728	2.791	23.81
1605	95	13	148	2.812	8.131	2.895	31.98
1606	84	20	142	2.655	8.554	3.224	55.12
1607	75	NA	141	3.017	9.102	3.02	21.54
1608	104	9	145	NA	NA	NA	NA
1609	98	11	146	2.859	8.502	2.975	14.53
1610	117	13	152	2.54	8.331	3.282	55.29
1611	93	11	110	3.305	9.31	2.82	7.57
1612	105	20	118	2.915	8.443	2.898	47.2
1613	100	NA	142	2.797	8.305	2.972	32.05
1614	91	15	151	2.837	8.481	2.992	36.46
1615	102	14	138	3.088	8.781	2.846	30.32
1616	93	10	142	2.709	8.652	3.197	43.02
1617	107	22	142	2.851	8.448	2.966	50.87
1618	116	16	146	2.761	8.417	3.05	50.87
1619	94	13	149	2.914	8.895	3.055	28.78
1620	93	NA	139	2.742	8.188	2.988	19.34
1621	92	10	121	NA	NA	NA	NA
1622	74	7	120	3.151	9.552	3.034	11.62
1623	109	25	149	2.899	8.642	2.983	69.7
1624	79	21	143	NA	NA	NA	NA
1625	100	19	NA	2.66	8.387	3.156	62.39
1626	92	21	141	2.92	8.758	3.002	41.35
1627	94	11	NA	2.542	8.053	3.17	33.83
1628	75	NA	142	2.786	8.191	2.943	33.65
1629	91	NA	141	3.346	9.491	2.84	30.64
1630	105	NA	140	2.83	8.24	2.914	18.85
1631	105	NA	142	2.608	8.063	3.094	46.29
1632	70	7	105	2.949	8.156	2.768	1.32
1633	80	15	155	2.595	8.521	3.287	54.87
1634	87	12	133	NA	NA	NA	NA
1635	115	19	151	3.401	10.073	2.965	31.29
1636	111	12	145	2.831	8.464	2.993	42.18
1637	108	14	144	2.942	8.237	2.802	36.3
1638	59	7	142	2.751	8.255	3.003	NA
1639	90	13	140	3.115	9.058	2.911	8.33
1640	93	7	110	2.816	8.041	2.858	5
1641	91	8	135	3.102	8.755	2.824	8.03
1642	126	13	NA	2.701	8.549	3.168	35.72
1643	92	10	140	3.279	9.304	2.84	15.36
1644	108	17	140	2.738	8.684	3.174	44.51
1645	69	NA	143	2.734	8.797	3.22	14.11
1646	85	5	133	2.726	8.446	3.101	5.25
1647	96	13	134	2.639	8.157	3.094	27.35
1648	114	19	143	2.672	8.011	3.002	55.41
1649	95	17	155	2.677	8.26	3.088	48.41
1650	82	10	139	2.933	7.977	2.721	4.12
1651	94	10	141	3.005	9.447	3.147	21.83
1652	60	NA	134	NA	NA	NA	NA
1653	74	8	144	3.126	9.234	2.955	7.71
1654	84	15	116	3.182	9.186	2.889	21.35
1655	82	24	139	3.112	8.576	2.759	23.78
1656	78	10	148	2.965	8.581	2.897	29.53
1657	62	7	110	2.785	8.245	2.964	4.57
1658	99	16	145	3.355	9.532	2.843	40.44
1659	104	13	139	3.021	8.659	2.869	31.78
1660	88	41	114	2.993	8.703	2.914	3.89
1661	78	20	115	2.884	8.409	2.918	14.21
1662	86	18	143	2.907	8.889	3.062	46.26
1663	86	11	108	3.095	8.852	2.864	10.64
1664	92	18	115	2.86	8.197	2.87	18.84
1665	117	24	135	3.21	9.03	2.816	48.24
1666	109	16	133	2.803	8.592	3.068	22.11
1667	109	11	144	3.269	8.997	2.754	18.97
1668	108	16	125	3.011	8.704	2.896	26.18
1669	72	6	120	NA	NA	NA	NA
1670	108	25	139	3.113	8.442	2.716	51.27
1671	108	22	139	3.339	9.03	2.709	26.9
1672	122	18	145	2.642	8.247	3.129	47.54
1673	90	16	129	2.504	8.099	3.237	34.89
1674	93	12	142	2.69	7.766	2.889	18.63
1675	115	16	142	2.629	8.319	3.166	44.59
1676	98	16	115	3.004	8.617	2.871	28.64
1677	103	20	143	3.306	9.146	2.769	66.04
1678	107	12	114	2.968	8.643	2.915	10.64
1679	96	13	143	2.847	7.796	2.744	29.67
1680	111	20	145	2.842	8.746	3.08	54.01
1681	62	10	114	2.5	7.781	3.115	11.54
1682	73	10	120	3.008	8.616	2.867	8.22
1683	66	15	110	3.288	9.425	2.87	5.11
1684	80	15	117	2.768	7.931	2.867	12.61
1685	101	19	128	2.943	9.403	3.199	31.02
1686	112	18	130	2.804	8.131	2.902	31.29
1687	70	17	118	2.846	8.275	2.912	21.6
1688	NA	NA	NA	NA	NA	NA	NA
1689	105	22	146	2.652	8.375	3.161	57.1
1690	78	13	145	2.858	8.51	2.98	30.66
1691	83	11	138	2.941	8.512	2.896	25.84
1692	88	14	126	2.828	7.964	2.819	13.63
1693	60	2	129	NA	NA	NA	NA
1694	98	11	144	2.928	8.432	2.884	30.68
1695	117	15	151	2.586	8.503	3.289	50.19
1696	103	13	135	2.877	8.678	3.021	19.32
1697	115	17	127	2.87	8.67	3.023	25.72
1698	143	16	155	2.808	8.287	2.954	37.76
1699	90	16	125	2.674	8.043	3.012	33.14
1700	88	10	124	2.844	8.526	3	6.8
1701	82	6	112	2.941	8.497	2.9	3.17
1702	96	13	137	2.902	8.167	2.818	23.45
1703	82	13	118	3.045	8.652	2.844	24.65
1704	100	7	142	NA	NA	NA	NA
1705	122	17	146	2.762	8.186	2.966	49.07
1706	90	17	150	2.912	8.434	2.9	46.76
1707	133	12	153	2.805	8.434	3.008	31.11
1708	100	23	117	2.859	7.922	2.774	15.31
1709	100	14	127	2.963	8.341	2.816	10.76
1710	77	18	118	2.81	8.748	3.117	26.11
1711	113	14	121	2.845	8.154	2.869	23.92
1712	86	22	113	2.871	8.52	2.973	19.6
1713	95	32	122	3.55	9.644	2.72	22.92
1714	130	14	152	2.75	8.217	2.991	48.72
1715	89	32	NA	2.684	8.34	3.11	33.09
1716	89	17	108	2.84	8.166	2.878	10.72
1717	89	27	109	2.571	7.976	3.104	23.55
1718	119	27	109	2.902	8.468	2.92	25.15
1719	104	11	120	2.665	8.315	3.123	15.63
1720	101	14	142	2.931	8.493	2.902	27.52
1721	100	25	114	2.801	8.219	2.937	17.27
1722	96	24	122	2.99	8.567	2.87	28.87
1723	121	13	149	2.938	8.565	2.917	55.93
1724	103	15	120	3.137	9.079	2.896	18.57
1725	107	13	139	NA	NA	NA	34.12
1726	93	24	108	2.727	8.46	3.105	22.03
1727	106	21	NA	2.802	9.026	3.224	21.55
1728	96	20	122	3.248	9.546	2.943	24.85
1729	100	16	145	2.713	8.096	2.987	34.91
1730	81	24	111	2.795	7.883	2.823	6.03
1731	94	12	117	2.819	8.471	3.008	15.75
1732	102	18	116	2.701	8.155	3.022	19.91
1733	124	22	106	2.838	7.986	2.817	49.99
1734	99	13	140	2.942	9.1	3.096	47.63
1735	76	20	118	NA	NA	NA	NA
1736	80	13	NA	2.568	8.171	3.185	23.84
1737	134	19	141	3.107	9.376	3.021	50.09
1738	70	19	105	2.687	8.069	3.006	7.71
1739	99	21	118	2.836	8.612	3.039	26.13
1740	96	19	114	2.921	8.405	2.881	21
1741	116	38	125	3.077	8.431	2.743	34.75
1742	91	13	110	2.637	8.162	3.097	9.62
1743	112	21	110	NA	NA	NA	NA
1744	57	10	119	2.469	7.853	3.185	1.39
1745	118	13	145	2.772	8.301	2.997	34.38
1746	85	10	126	NA	NA	NA	NA
1747	80	23	115	2.785	7.976	2.866	26.01
1748	80	13	141	NA	NA	NA	NA
1749	103	23	127	2.622	8.212	3.135	24.21
1750	100	12	147	2.731	8.417	3.085	28.5
1751	104	11	146	NA	NA	NA	NA
1752	82	24	NA	3.247	8.421	2.597	20.08
1753	74	28	112	3.07	8.678	2.83	54.75
1754	77	5	116	2.756	8.001	2.907	1.11
1755	106	20	132	2.575	8.029	3.125	54.75
1756	117	10	143	2.811	8.431	3.002	28.31
1757	94	12	119	2.776	7.948	2.865	13.87
1758	76	15	118	3.403	9.521	2.802	14.81
1759	82	8	125	2.665	8.459	3.175	21.51
1760	90	17	134	3.019	8.757	2.904	47.12
1761	92	23	109	3.49	9.326	2.678	16.14
1762	63	9	120	2.743	8.528	3.112	9.12
1763	77	15	140	2.895	8.545	2.954	41.56
1764	64	5	113	3.037	9.656	3.183	0.94
1765	100	11	120	2.561	8.252	3.226	23.96
1766	106	15	126	3.098	8.819	2.849	16.99
1767	86	12	153	3.191	9.232	2.896	25.98
1768	68	10	136	2.825	7.94	2.814	12.04
1769	72	13	142	2.689	8.213	3.058	17.66
1770	111	16	145	2.688	8.044	2.995	63.56
1771	87	9	134	NA	NA	NA	NA
1772	98	29	120	2.579	7.966	3.091	21.79
1773	104	8	135	3.17	9.273	2.928	3.52
1774	96	14	114	2.978	8.666	2.913	14.51
1775	92	14	108	NA	NA	NA	NA
1776	91	19	113	NA	NA	NA	NA
1777	100	10	142	2.515	7.663	3.048	26.74
1778	98	10	143	2.697	8.1	3.006	21.18
1779	64	10	121	2.718	8.122	2.991	12.91
1780	94	22	NA	3.091	8.539	2.764	16.31
1781	102	16	116	2.979	8.576	2.882	18.6
1782	101	35	122	2.977	8.586	2.888	36.49
1783	86	17	125	2.596	8.037	3.098	29.78
1784	114	11	151	2.841	8.816	3.105	34.63
1785	81	16	149	NA	NA	NA	NA
1786	92	16	121	2.97	8.35	2.813	8.77
1787	93	10	128	2.982	8.424	2.828	15.08
1788	103	16	120	2.599	8.27	3.184	20.34
1789	103	11	133	3.122	8.406	2.696	26.07
1790	92	28	114	2.627	7.998	3.047	38.56
1791	84	13	142	2.817	8.289	2.945	35.13
1792	83	15	122	2.768	8.552	3.092	26.11
1793	100	15	127	3.375	9.29	2.755	22.34
1794	112	20	148	2.708	8.678	3.206	62.63
1795	99	15	154	2.897	8.524	2.944	24.04
1796	92	20	118	2.829	8.229	2.912	31.29
1797	105	12	140	2.787	7.982	2.866	17.73
1798	70	12	119	2.802	8.101	2.894	10.06
1799	99	13	142	3.122	9.316	2.985	22.4
1800	63	16	129	2.613	8.499	3.256	8.84
1801	89	NA	118	3.352	9.087	2.713	11.94
1802	78	9	133	3.128	9.313	2.979	17
1803	93	15	118	3.247	8.76	2.701	9.62
1804	106	10	144	2.814	8.308	2.955	22.04
1805	97	13	131	2.835	8.651	3.054	18.59
1806	67	11	145	2.717	8.127	2.993	14.82
1807	109	12	149	3.043	8.808	2.896	35.16
1808	83	17	113	2.845	8.284	2.915	16.84
1809	126	10	157	2.938	8.822	3.005	33.45
1810	NA	24	120	2.641	8.089	3.067	13.15
1811	92	11	131	2.927	8.512	2.91	23.22
1812	100	16	137	2.476	7.916	3.2	41.76
1813	82	10	NA	3.063	9.135	2.986	13.81
1814	86	11	133	3.024	9.421	3.12	15.75
1815	76	12	152	2.944	8.481	2.882	20.61
1816	70	9	115	2.838	8.284	2.921	22.59
1817	89	11	143	2.905	8.31	2.862	5.33
1818	123	10	158	2.717	8.653	3.186	30.02
1819	108	9	NA	3.082	9.037	2.934	7.58
1820	80	7	129	3	9.284	3.097	17.46
1821	104	12	144	2.753	8.389	3.048	41.18
1822	67	7	118	3.103	8.745	2.821	4.23
1823	80	14	142	2.999	8.934	2.982	41.09
1824	62	17	110	2.846	8.335	2.931	12.31
1825	65	11	134	2.745	8.094	2.954	14.32
1826	94	12	122	3.08	8.681	2.82	9.61
1827	78	9	129	2.76	8.231	2.985	10.29
1828	84	6	120	2.661	7.906	2.973	5.49
1829	71	30	108	2.855	8.342	2.928	26.25
1830	90	13	120	3.112	8.859	2.849	15.81
1831	109	20	125	3.243	9.106	2.809	19.17
1832	63	10	123	3.19	9.376	2.941	10.31
1833	102	10	143	2.983	8.962	3.007	16.24
1834	86	32	115	2.795	8.002	2.866	24.9
1835	86	16	145	2.833	8.318	2.94	44.52
1836	95	9	150	2.404	7.822	3.257	20.73
1837	77	15	141	3.187	8.86	2.786	22.2
1838	98	14	134	2.716	8.115	2.991	33.76
1839	87	19	109	2.719	8.184	3.012	7.14
1840	89	9	128	3.399	9.23	2.718	10.61
1841	91	12	145	2.815	8.283	2.945	32.46
1842	80	13	130	2.445	7.928	3.244	34.95
1843	94	13	157	2.873	9.081	3.164	37.9
1844	85	16	114	2.684	8.26	3.08	7.49
1845	118	15	139	3.191	9.311	2.921	31.53
1846	103	8	146	2.941	8.024	2.731	10.91
1847	110	10	142	3.317	9.168	2.767	19.91
1848	107	12	146	2.847	8.552	3.005	38.05
1849	105	9	146	2.946	8.891	3.02	27.97
1850	94	16	117	2.604	8.174	3.142	16.8
1851	82	24	111	2.916	8.252	2.833	28.08
1852	74	23	117	2.823	9.037	3.204	14.34
1853	75	10	118	2.781	8.285	2.982	6.07
1854	91	11	116	2.882	8.637	2.999	9.44
1855	98	16	117	2.971	9.318	3.138	8.46
1856	114	14	145	2.828	8.252	2.92	39.76
1857	86	7	143	2.536	8.227	3.247	22.57
1858	106	9	141	NA	NA	NA	NA
1859	111	12	134	2.705	8.404	3.109	38.21
1860	81	19	128	2.714	8.038	2.963	38.77
1861	82	13	115	2.633	8.285	3.152	9.31
1862	125	11	131	3.162	8.304	2.63	10.48
1863	63	6	122	2.932	8.485	2.895	3.7
1864	126	11	148	2.731	8.21	3.009	30.26
1865	118	14	145	3.155	8.837	2.803	37.53
1866	102	13	NA	2.631	7.672	2.922	13.26
1867	99	11	123	3.099	8.516	2.75	20.01
1868	100	25	124	2.507	7.838	3.13	24.68
1869	100	16	118	3.057	8.765	2.869	8.13
1870	93	21	117	NA	NA	NA	NA
1871	104	21	NA	2.624	7.774	2.967	16.65
1872	87	7	138	2.813	8.606	3.063	9.71
1873	110	11	132	2.756	8.339	3.029	35.27
1874	97	15	118	2.974	8.603	2.895	13.48
1875	94	16	120	2.941	8.386	2.854	11.82
1876	105	13	136	2.591	7.82	3.022	27.16
1877	105	18	141	2.886	8.228	2.854	51.19
1878	72	12	128	3.181	8.805	2.772	16.2
1879	82	29	116	2.576	8.022	3.118	25.84
1880	94	13	NA	2.801	8.058	2.88	21.86
1881	85	8	140	2.933	8.748	2.985	16.98
1882	86	7	142	2.746	8.241	3.004	20.24
1883	76	22	122	2.531	8.055	3.188	3.08
1884	116	9	144	2.922	8.379	2.871	20.77
1885	101	10	143	3.119	8.84	2.836	NA
1886	90	9	156	2.776	9.027	3.255	28.89
1887	83	32	119	3.043	8.863	2.916	36.94
1888	98	13	129	2.521	8.21	3.26	15.22
1889	101	9	127	3.008	8.631	2.871	13.79
1890	98	7	153	2.603	8.096	3.113	22.27
1891	98	9	129	2.689	8.254	3.072	16.05
1892	79	15	129	2.483	7.698	3.103	22.68
1893	118	16	146	3.347	9.495	2.839	35.94
1894	101	23	129	2.836	8.33	2.939	27.23
1895	79	5	107	2.726	8.021	2.944	2.76
1896	83	16	130	2.904	8.269	2.85	38.5
1897	77	5	127	2.855	8.597	3.014	6.13
1898	98	13	144	3.225	9.42	2.924	34.76
1899	90	9	112	3.071	8.666	2.825	4.52
1900	112	19	151	2.935	9.6	3.274	80.08
1901	81	19	117	2.81	8.471	3.018	0.69
1902	97	15	123	2.586	8.403	3.252	17.46
1903	67	8	144	2.382	7.85	3.298	10.42
1904	103	18	134	3.045	8.52	2.801	12.62
1905	95	7	118	2.617	8.318	3.181	6.16
1906	103	13	115	2.788	8.304	2.981	14.62
1907	125	14	145	2.989	8.49	2.842	35.01
1908	120	13	141	2.736	8.22	3.008	27.26
1909	103	11	144	2.642	8.233	3.118	30.84
1910	75	6	133	2.671	7.753	2.906	9.66
1911	100	13	153	NA	NA	NA	NA
1912	107	15	146	NA	NA	NA	NA
1913	103	11	130	NA	NA	NA	NA
1914	117	8	150	2.862	9.222	3.224	21.91
1915	88	16	111	3.109	8.51	2.74	4.58
1916	88	9	143	2.382	7.768	3.265	17.77
1917	103	14	146	2.457	8.112	3.305	28.1
1918	137	10	152	2.706	8.91	3.295	30.43
1919	97	12	143	2.906	8.293	2.857	13.84
1920	99	14	141	2.702	8.094	2.998	38.04
1921	128	11	152	2.945	8.475	2.88	25.33
1922	116	14	132	3.281	9.349	2.851	18.26
1923	74	11	142	2.726	7.995	2.937	11.91
1924	96	13	107	2.933	7.826	2.671	13.37
1925	92	12	134	2.86	8.502	2.976	3.96
1926	123	11	142	2.65	7.872	2.972	46.55
1927	110	10	122	2.898	8.743	3.02	18.32
1928	87	21	145	2.765	8.77	3.174	40.79
1929	123	18	145	NA	NA	NA	NA
1930	70	16	116	2.979	8.922	2.998	12.23
1931	108	11	149	2.983	9.151	3.071	30.57
1932	65	11	127	3.173	9.641	3.043	12.25
1933	85	8	119	3.009	8.637	2.873	7.22
1934	113	13	151	2.982	8.85	2.971	41.35
1935	93	6	142	2.727	8.305	3.048	12.21
1936	99	9	143	2.912	8.365	2.875	21.37
1937	98	12	145	3.018	8.655	2.87	23.27
1938	107	21	141	3.156	9.17	2.908	58.7
1939	90	8	152	NA	NA	NA	NA
1940	81	7	138	3.264	9.616	2.949	15.96
1941	80	11	155	2.975	8.925	3.003	28.56
1942	97	16	114	3.022	8.478	2.809	20.72
1943	125	16	NA	2.675	8.465	3.167	62.03
1944	88	6	148	2.784	8.132	2.923	12.33
1945	109	10	145	2.699	8.162	3.027	26.45
1946	114	11	140	2.827	8.464	2.996	29.14
1947	111	14	145	3.034	8.715	2.874	21.49
1948	91	24	118	2.899	8.633	2.98	31.06
1949	78	18	143	2.507	8.176	3.264	42.55
1950	98	19	128	2.9	8.848	3.053	13.7
1951	74	11	144	2.698	8.135	3.018	23.56
1952	87	9	129	2.751	8.459	3.078	5.79
1953	119	8	144	2.925	8.8	3.012	19.44
1954	73	16	119	2.829	8.014	2.837	23.31
1955	99	13	127	2.562	8.12	3.171	31.02
1956	61	4	NA	2.799	8.475	3.031	2.43
1957	85	19	141	2.805	8.381	2.991	26.88
1958	107	15	143	2.977	8.65	2.908	40.04
1959	71	15	118	2.949	8.014	2.719	9.17
1960	91	12	142	2.789	8.314	2.983	13.33
1961	90	11	108	3.281	9.606	2.93	6.79
1962	63	23	105	3.307	9.255	2.806	13.23
1963	114	15	138	3.092	8.785	2.845	25.14
1964	90	16	115	NA	NA	NA	NA
1965	92	9	137	2.846	8.343	2.933	17.37
1966	78	8	109	3.105	8.797	2.84	3.24
1967	75	19	129	3.227	8.968	2.783	21.5
1968	96	13	134	2.638	8.07	3.061	21.51
1969	86	4	148	2.888	8.38	2.904	9.69
1970	96	11	146	2.882	8.638	2.999	16.61
1971	84	11	107	3.092	8.915	2.886	6.85
1972	98	10	143	2.919	9.004	3.087	12.91
1973	73	11	143	2.759	8.187	2.97	22.08
1974	65	25	111	2.793	8.395	3.009	19.77
1975	100	11	137	2.841	8.416	2.966	20.02
1976	95	20	137	2.576	8.482	3.296	37.63
1977	96	18	138	2.539	8.198	3.231	33.38
1978	89	14	114	2.752	8.361	3.041	7.93
1979	80	14	129	2.834	8.521	3.01	24.65
1980	94	18	141	2.48	8.168	3.296	38.09
1981	105	10	143	2.83	8.571	3.031	20.81
1982	97	7	142	2.891	8.381	2.901	10.09
1983	75	12	127	2.84	8.418	2.969	14.74
1984	125	10	125	2.538	7.905	3.116	26.15
1985	89	14	156	2.717	8.396	3.093	32.02
1986	83	9	142	3.257	9.301	2.858	11.05
1987	84	13	NA	2.96	8.622	2.916	13.11
1988	75	13	111	2.757	8.234	2.989	6.8
1989	76	18	128	2.988	8.438	2.829	15.67
1990	98	15	142	2.968	8.267	2.787	29.1
1991	88	13	155	3.189	9.352	2.936	29.31
1992	84	15	145	3.172	9.112	2.876	32.37
1993	128	8	152	2.835	8.747	3.087	27.59
1994	92	7	142	2.623	8.017	3.058	10.07
1995	62	4	136	NA	NA	NA	NA
1996	87	12	132	3.148	8.767	2.788	9.82
1997	112	16	153	3.177	9.414	2.965	57.73
1998	77	5	NA	2.766	8.032	2.906	1.36
1999	70	14	125	2.913	8.614	2.961	6.66
[truncated: 1,757 more rows]
