# Supplementary material
Source: publisher figshare collection journal article supplement (https://gsajournals.figshare.com/articles/dataset/_/15106053)
Supplement: Supplementary file 1 [file 1]

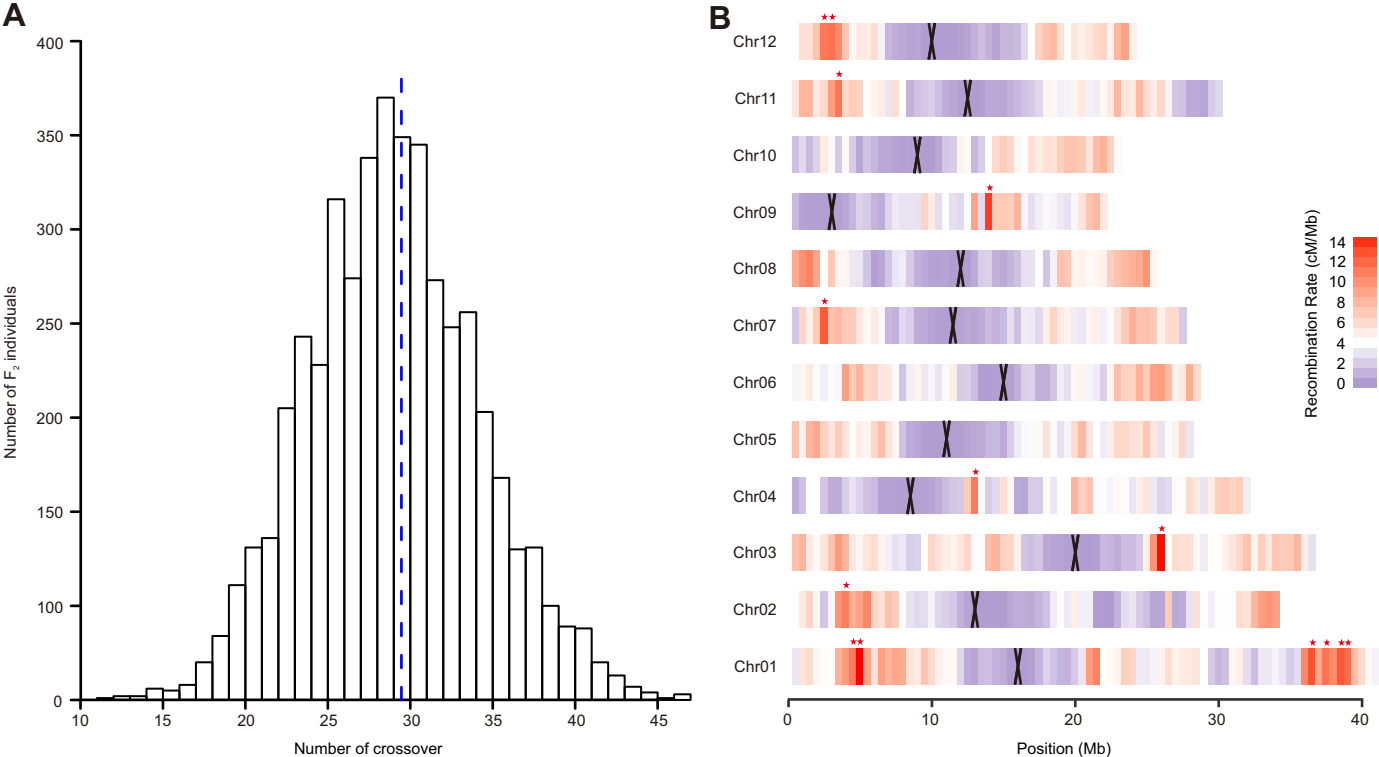

**Figure S3 The number of crossover in each  $F_2$  individual and crossover distribution among the genome.** (A) Blue dot line indicates the mean number of crossover, with average of 29.46 and median of 29. (B) The black cross lines indicate centromere and red stars label the recombination hotspots at statistical significant level ( $P < 0.05$ ) under 1,000 times permutation test.
