# Supplementary material
Source: publisher figshare collection journal article supplement (https://gsajournals.figshare.com/articles/dataset/_/15106053)
Supplement: Supplementary file 3 [file 1]

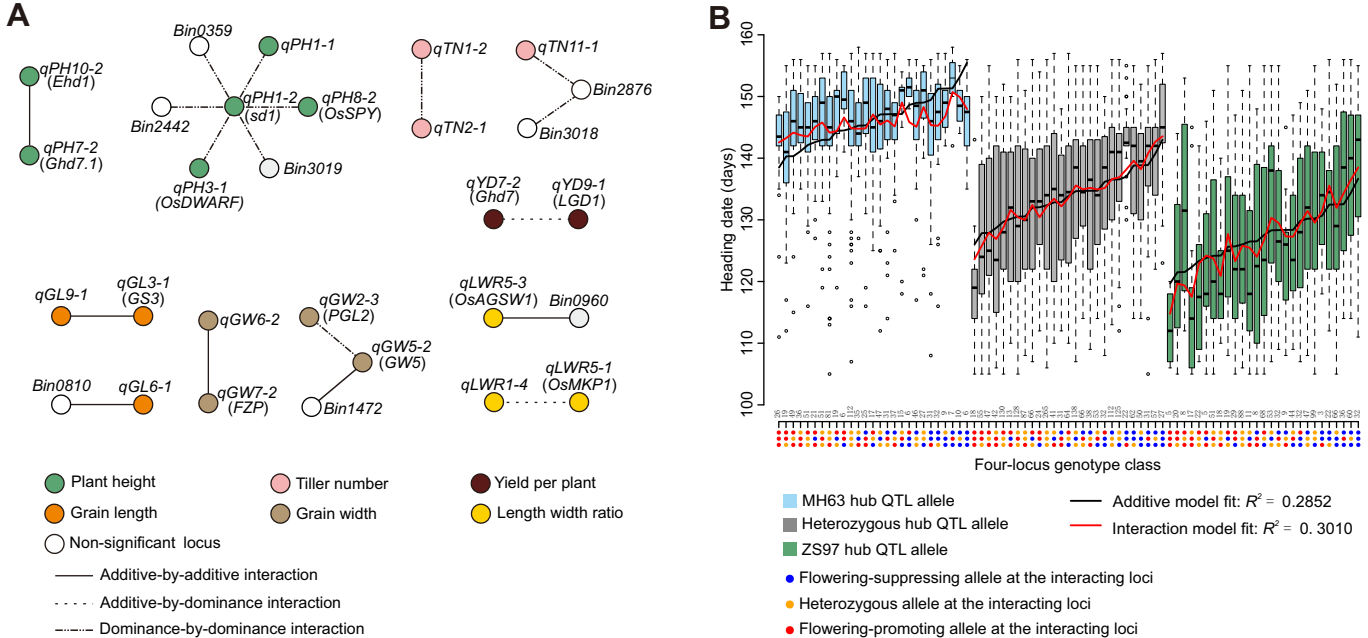

**Figure S12 Genetic interaction networks for six traits and phenotypic distributions in heading date.** (A) Genetic interaction networks for plant height, tiller number, yield per plant, grain length, grain width and length width ratio. The name of QTLs and bin-markers are given. The genes in the brackets are inferred candidate genes for QTLs. (B) Phenotypic distributions of  $F_2$  individuals with different combination of interacting alleles in four-locus network at *Hd1* locus in heading date. The box plot is shown for each of the 81 subpopulation. Color indicates the genotype at the hub QTL (cyan/gray/green boxes for MH63/Heterozygous/ZS97 genotypes, respectively). The  $x$  axis represents the four-locus genotype classes, where blue/yellow/red dots indicate phenotypic value increasing/heterozygous/decreasing alleles at the interacting loci. The regression lines illustrate the fit for linear additive (black) and interaction (red) models. The number above the  $x$  axis is the number of individuals in each genotype class.
