# Supplementary material
Source: publisher figshare collection journal article supplement (https://gsajournals.figshare.com/articles/dataset/_/15106053)
Supplement: Supplementary file 6 [file 1]

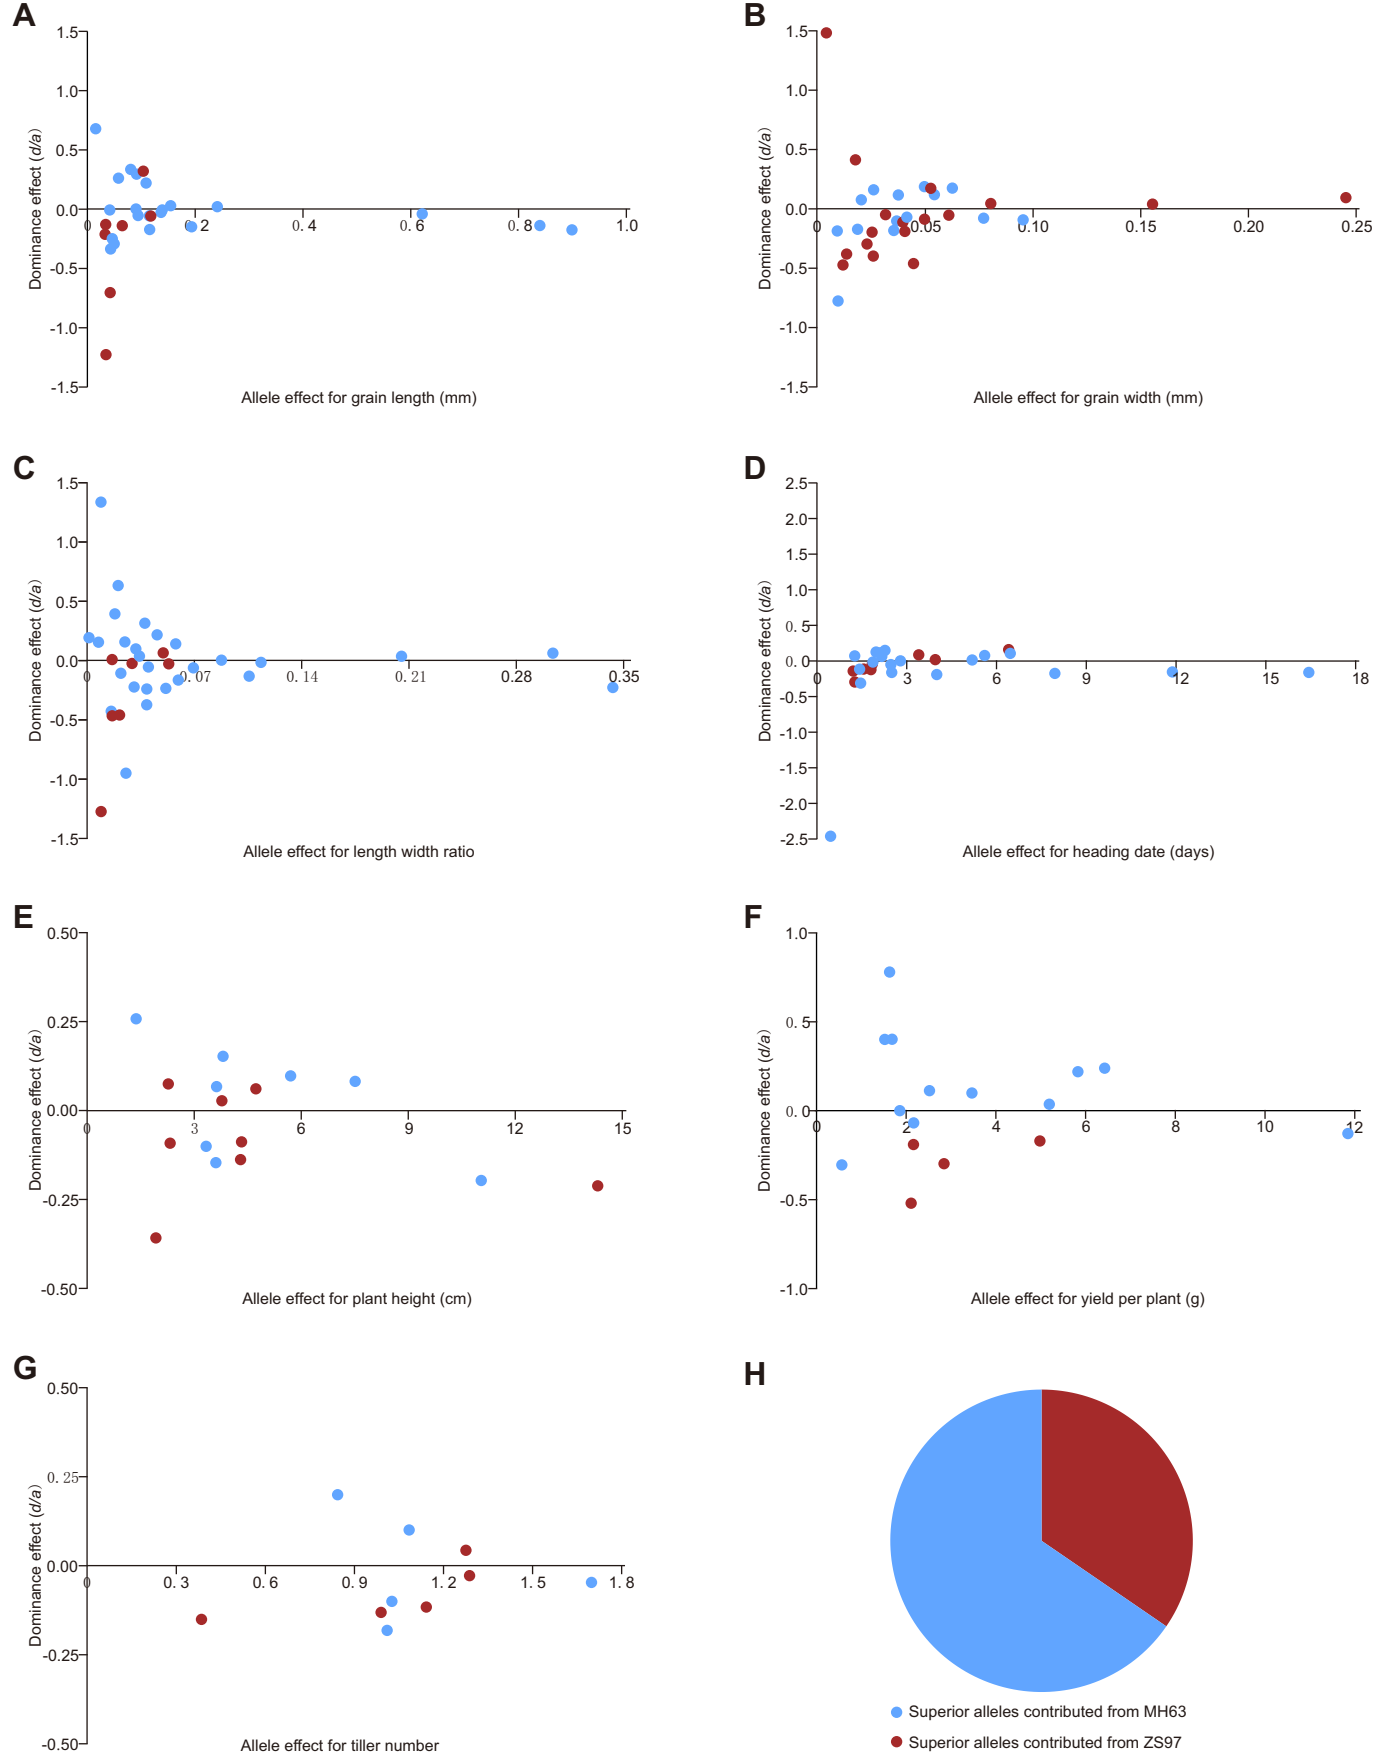

**Figure S16 Evaluation of dominance effects for all yield-related QTLs.** (A-G), Plots of the dominance effect for 162 QTLs underlying seven yield-related traits. (H) The proportions of the superior alleles contributors (from male parent (MH63) and female parent (ZS97)) are indicated.
