# Supplementary material
Source: publisher figshare collection journal article supplement (https://gsajournals.figshare.com/articles/dataset/_/15106053)
Supplement: Supplementary file 7 [file 1]

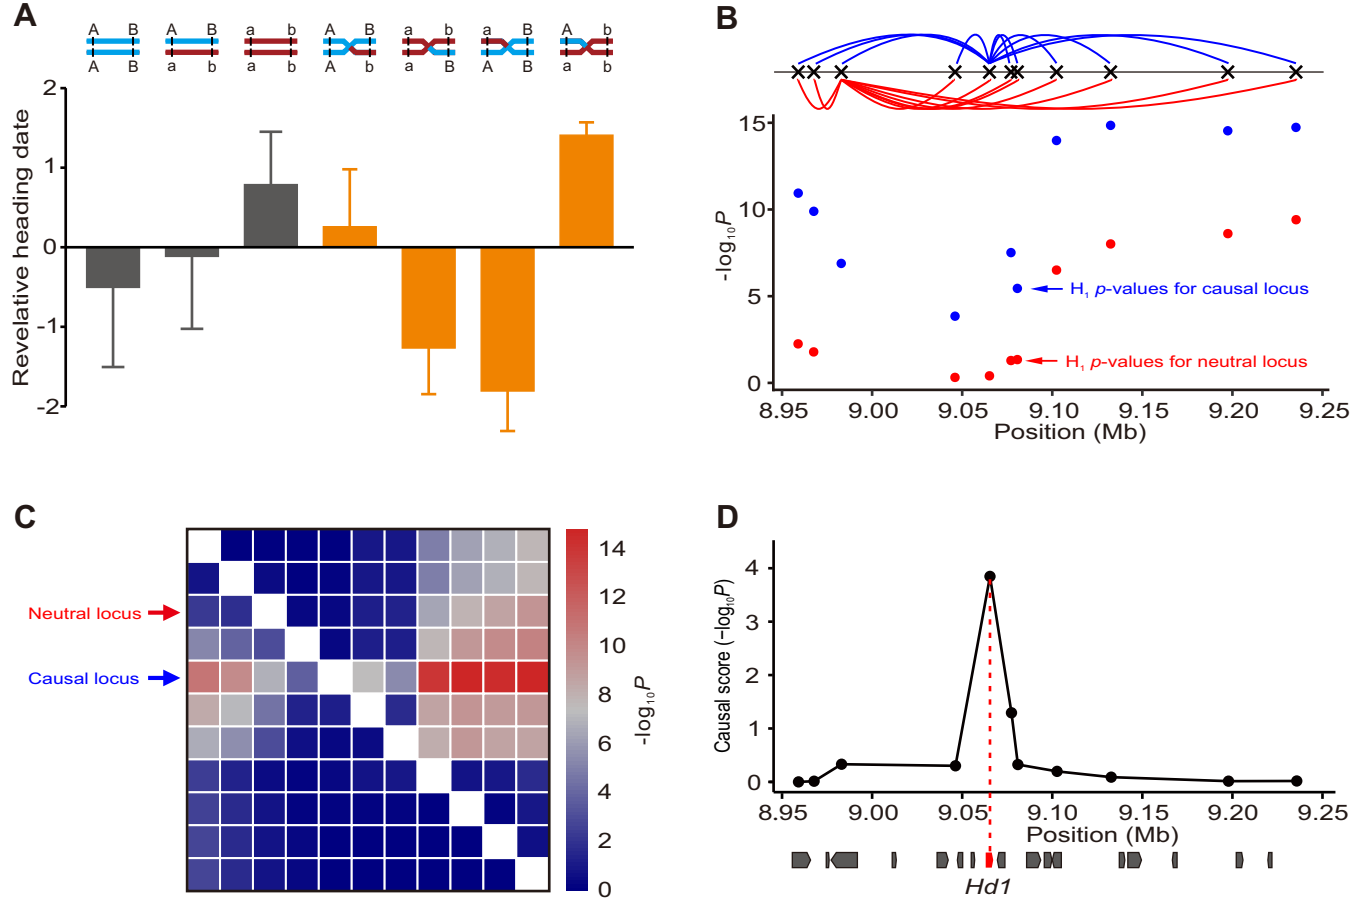

**Figure S9 Principle of mapping causal gene for *qHD6-2* for controlling heading date.** (A) All seven genotypic combinations between a pair of loci in the candidate gene region. While most of the  $F_2$  individuals have same genotype between two loci (1<sup>st</sup>, 2<sup>nd</sup> and 3<sup>rd</sup> column), a small fraction have recombination between homozygous and heterozygous genotypes (4<sup>th</sup>, 5<sup>th</sup>, 6<sup>th</sup> and 7<sup>th</sup> column). We evaluated a null hypothesis  $H_0$ , that the locus on the left co-segregated with causal gene. The alternative hypothesis  $H_1$ , that the locus on the right co-segregated with causal gene, requires swapping the genotype on the left locus should not lead to phenotypic change (such as 6<sup>th</sup> column deviate from the distribution of 1<sup>st</sup> column, 7<sup>th</sup> column deviate from the distribution of 3<sup>rd</sup> column, 4<sup>th</sup> or 5<sup>th</sup> column deviate from 2<sup>nd</sup> column). The probability of  $H_1$  occurring by chance is determined by using one-way ANOVA analysis followed by Tukey-Kramer multiple comparisons test. Conversely, if the null hypothesis  $H_0$  is that the locus on the right co-segregated with causal gene and the alternative hypothesis  $H_1$  is that the locus on the left co-segregated with causal gene, the  $H_1$  means swapping the genotype on the right locus should be neutral. (B) The alternative hypothesis  $H_1$   $p$ -values for causal locus co-segregated with causal gene (row 5 in (C), colored in blue). The alternative hypothesis  $H_1$   $p$ -values for neutral locus co-segregated with causal gene (row 3 in (C), colored in red). (C) Heatmap shows  $p$ -values from pairwise comparisons between all pairs of loci in the candidate gene region. For position (i,j) in the heatmap, the null hypothesis  $H_0$  suggests locus<sub>i</sub> co-segregated with causal gene versus the alternative hypothesis  $H_1$  that the locus<sub>j</sub> co-segregated with causal gene. Transformed  $p$ -values for the alternative hypothesis  $H_1$  are displayed. (D) Causal score illustration for a causal gene in the candidate gene region of *qHD6-2*. Previously cloned gene (*Hd1*) controlling the heading date is labeled with red color.
