# Supplementary material
Source: publisher figshare collection journal article supplement (https://gsajournals.figshare.com/articles/dataset/_/15106053)
Supplement: Supplementary file 8 [file 1]

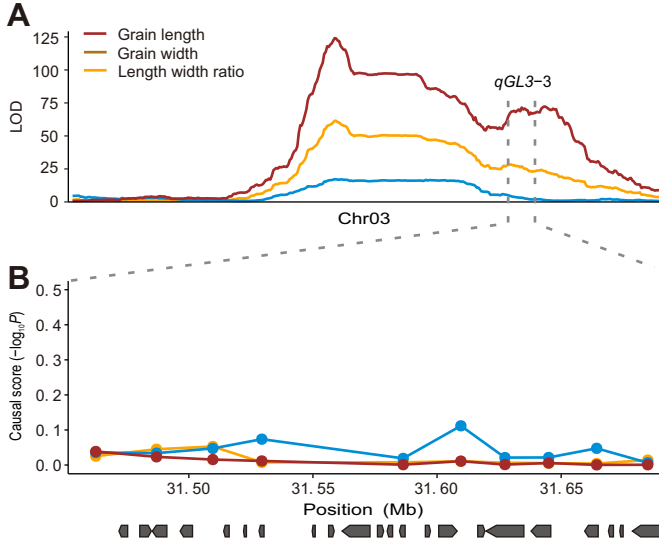

**Figure S11 Mapping causal gene for minor-effect QTL *qGL3-3*.** (A) Traditional LOD score plot for *qGL3-3* controlling grain shape on chromosome 3. (B) The causal score plot for each locus in the target region.
