# Supplementary material
Source: publisher figshare collection journal article supplement (https://gsajournals.figshare.com/articles/dataset/_/15106053)
Supplement: Supplementary file 10 [file 1]

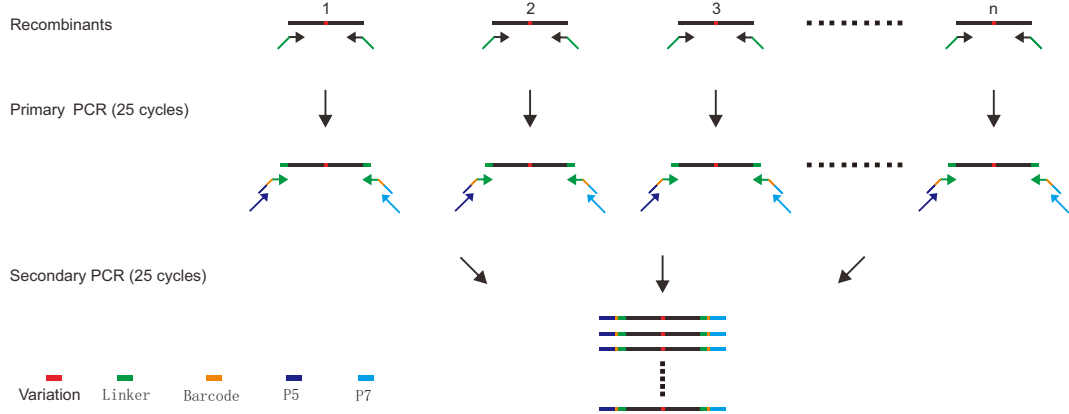

**Figure S7 Schematic illustration of targeted sequencing library construction.** The target regions of recombinants are amplified using locus-specific primers with linker sequences. The products of primary PCR are used as templates for the secondary PCR. Barcode and adaptor sequences are added in secondary PCR. Then all PCR products are mixed in equimolar amounts into one library and sent for sequencing.
