# Supplementary material
Source: publisher figshare collection journal article supplement (https://gsajournals.figshare.com/articles/dataset/_/15106053)
Supplement: Supplementary file 11 [file 1]

**A**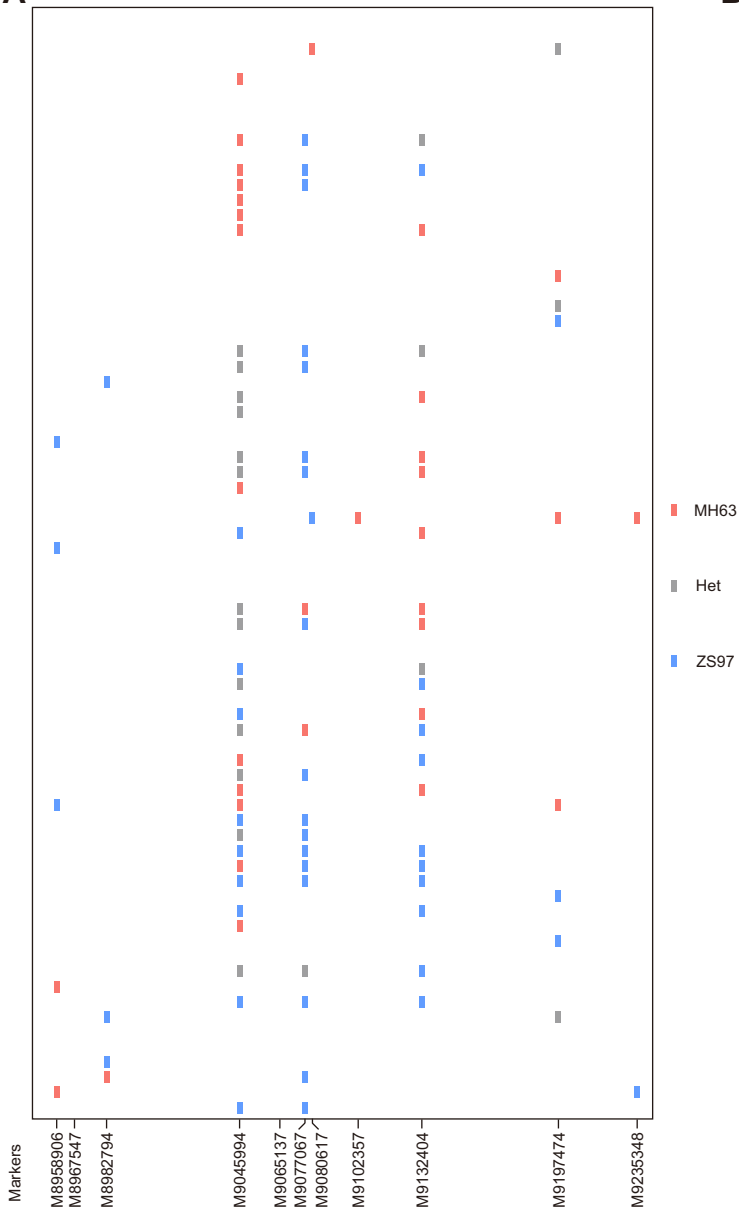**B**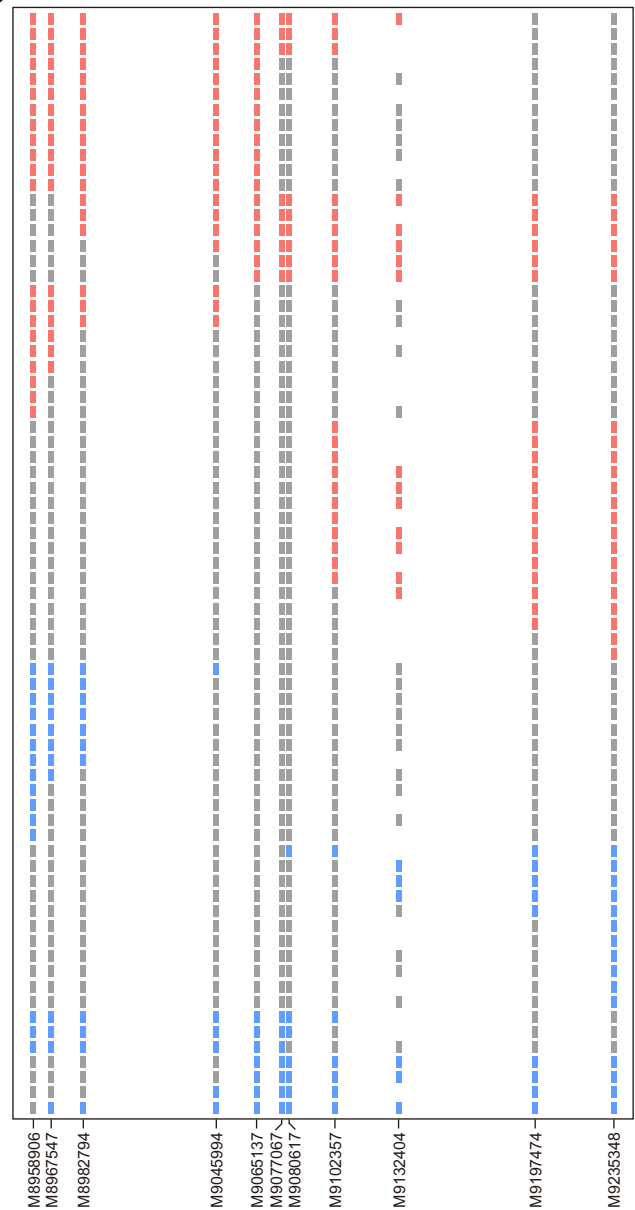

**Figure S8 Genotyping the 73 F<sub>2</sub> recombinants at *qHD6-2* locus by using GBS (A) and targeted sequencing (B) method, respectively.**
