# Supplementary material
Source: publisher figshare collection journal article supplement (https://gsajournals.figshare.com/articles/dataset/_/15106053)
Supplement: Supplementary file 12 [file 1]

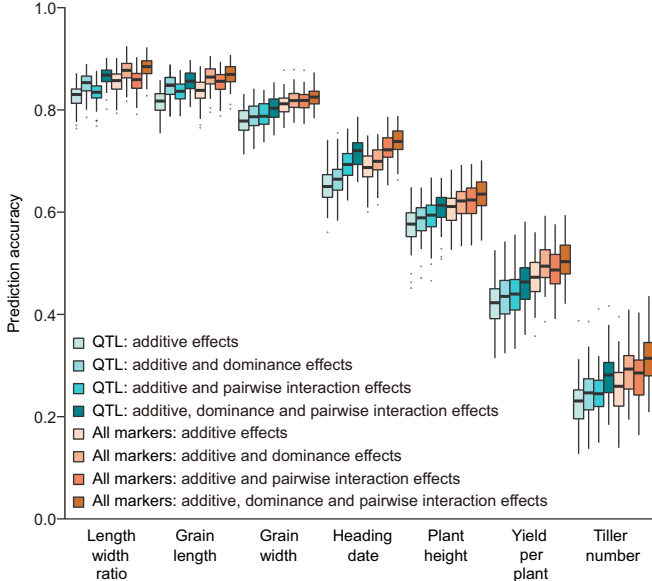

**Figure S15 Phenotypic prediction accuracies for seven traits with different combination of various genetic components using either QTL peak markers or all markers in genome.** Prediction accuracy is defined as the correlation between the observed and predicted phenotypic values obtained from replicated 10-fold cross validation.
