# Supplementary material
Source: publisher figshare collection journal article supplement (https://gsajournals.figshare.com/articles/dataset/_/15106053)
Supplement: Supplementary file 13 [file 1]

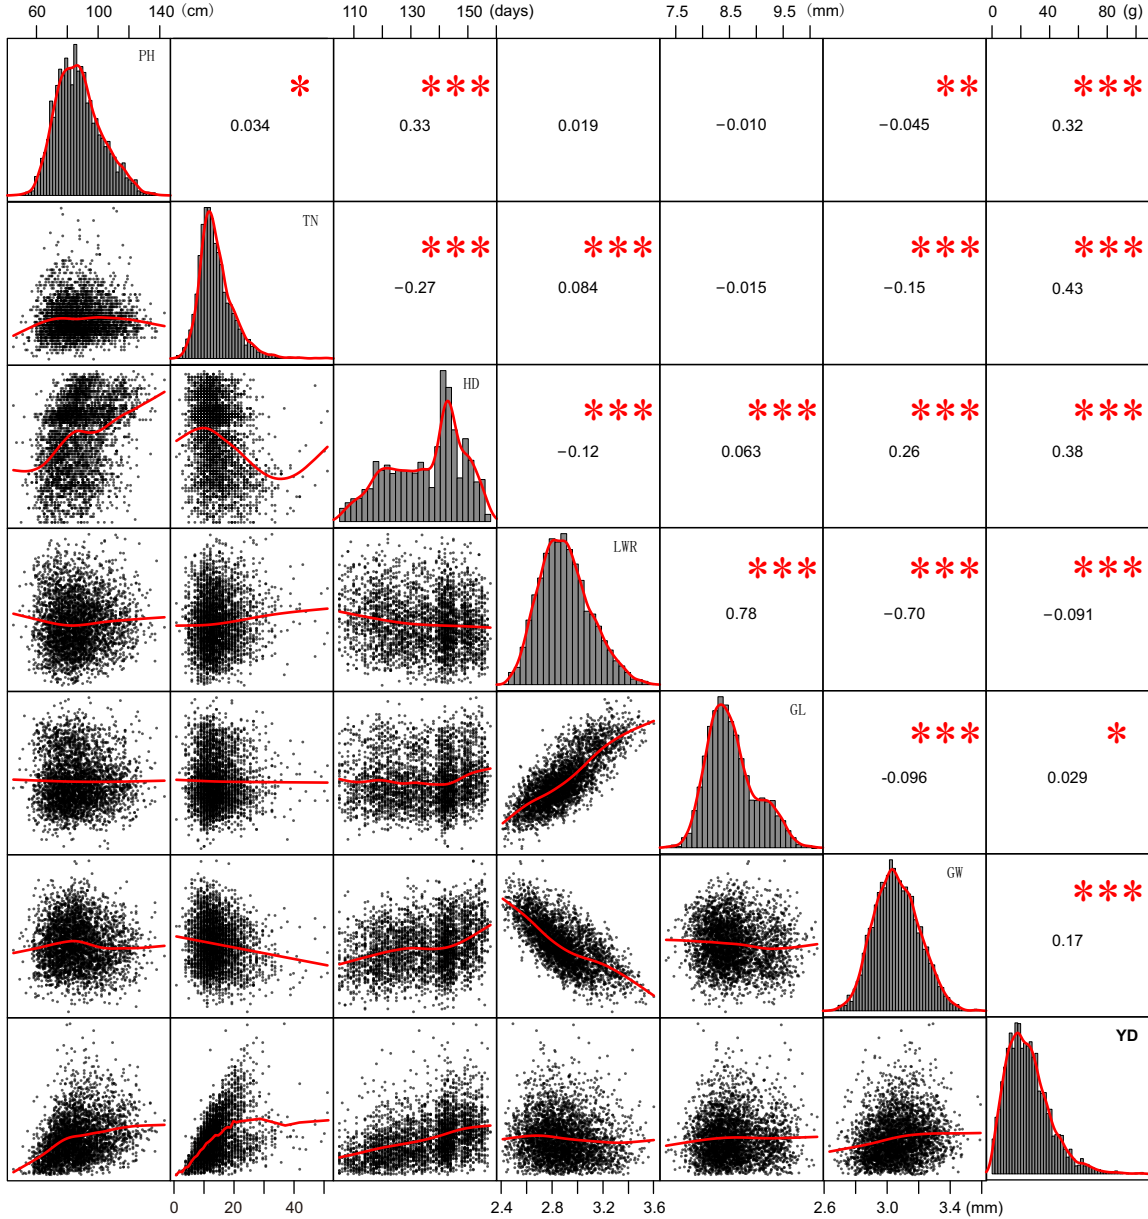

**Figure S4 The pairwise correlation analysis between seven traits.** The lower diagonal shows scatter plots with fitted line between every two traits. The diagonal shows the distribution pattern. The upper diagonal shows the Pearson correlation coefficients with labeled significant level. \* means  $P < 0.05$ , \*\* means  $P < 0.01$ , \*\*\* means  $P < 0.001$ .
