# Supplementary material
Source: publisher figshare collection journal article supplement (https://gsajournals.figshare.com/articles/dataset/_/15106053)
Supplement: Supplementary file 15 [file 1]

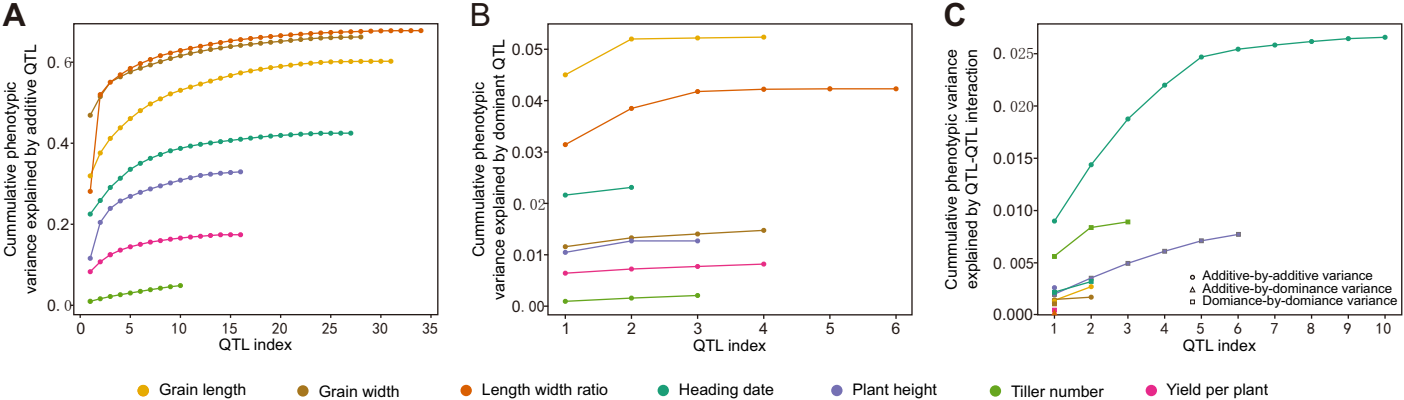

**Figure S6** For each trait, the genetic effects of detected additive QTL (A), dominant QTL (B) and QTL-QTL interactions (C) are sorted from largest to smallest, and the cumulative phenotypic variance explained are plotted against the number of detected additive QTL, dominant QTL and QTL-QTL interactions.
